# 1 **A circuit of protein-protein regulatory interactions enables polarity** 2 **establishment in a bacterium**

3 Wei Zhao<sup>1</sup>, Samuel W. Duvall<sup>1</sup>, Kimberly A. Kowallis<sup>1</sup>, Dylan T. Tomares<sup>1</sup>, Haley N. Petitjean<sup>1</sup>,  
4 W. Seth Childers<sup>1</sup>

5 <sup>1</sup>Department of Chemistry, University of Pittsburgh, Pittsburgh, PA 15260, USA.

6 Lead Contact: W. Seth Childers; E-mail: [wschild@pitt.edu](mailto:wschild@pitt.edu)

## 7 **Abstract**

8 Asymmetric cell division generates specialized daughter cells that play a variety of roles  
9 including tissue morphogenesis in eukaryotes and pathogenesis in bacteria. In the gram-negative  
10 bacterium *Caulobacter crescentus*, asymmetric localization of two biochemically distinct  
11 signaling hubs at opposite cell poles provides the foundation for asymmetric cell division.  
12 Through a set of genetic, synthetic biology and biochemical approaches we have characterized  
13 the regulatory interactions between three scaffolding proteins. These studies have revealed that  
14 the scaffold protein PodJ functions as a central mediator for organizing the new cell signaling  
15 hub, including promoting bipolarization of the central developmental scaffold protein PopZ. In  
16 addition, we identified that the old pole scaffold SpmX serves as a negative regulator of PodJ  
17 subcellular accumulation. These two scaffold-scaffold regulatory interactions serve as the core of  
18 an integrated cell polarization circuit that is layered on top of the cell-cycle circuitry to  
19 coordinate cell differentiation and asymmetric cell division.

20 **Keywords:** *Caulobacter crescentus*; asymmetric cell division; cell polarity; scaffold proteins;  
21 PodJ; PopZ; cell-cycle regulation; PleC; SpmX

22  
23

## 24 **Introduction**

25           The earliest stage of an asymmetric cell division is the unequal inheritance of cell fate  
26 determinants. While models of eukaryotic cell polarity have been developed (Chau et al., 2012)  
27 it remains unclear what mechanisms are employed by bacteria to achieve polarity (McAdams  
28 and Shapiro, 2009). The degree of asymmetry of cell division in the bacterial kingdom has only  
29 been sparsely examined, however broad implications in pathogenesis (Van der Henst et al.,  
30 2013) and persister cell development (Aakre and Laub, 2012) have been reported.

31           *Caulobacter crescentus* is a well-established bacterial model organism for examining  
32 how bacterial cells divide asymmetrically (Shapiro et al., 1971). The cell division results in two  
33 morphologically and functionally distinct cells (Figure 1A): a motile swarmer cell that is  
34 incapable of chromosome replication and a sessile stalked cell that initiates replication once per  
35 cell-cycle (Bergé and Viollier, 2018; Curtis and Brun, 2010; Lasker et al., 2016). These two cell-  
36 types utilize bimodal survival strategies, including distinct responses to heavy metal stress  
37 (Lawaree et al., 2016) and differences in buoyancy (Ardissone et al., 2014). The swarmer cell  
38 can differentiate into stalked cell by shedding the flagellum and initiating stalk biogenesis and  
39 chromosome replication (Figure 1A). Genetic studies have revealed that *C. crescentus* bacteria  
40 do not use the primary cell polarity regulators that drive eukaryotic stem cell division, but use a  
41 set of self-assembled scaffolding proteins to achieve these goals (Bergé and Viollier, 2018;  
42 Lasker et al., 2016; Tsokos and Laub, 2012).

43           Much of the developmental differences between the *C. crescentus* swarmer and stalked  
44 cell-types is coordinated by the CtrA signaling pathway which regulates more than 90 genes  
45 associated with flagella and stalk biogenesis, chromosome replication and cell wall growth (Laub  
46 et al., 2002). Asymmetric activation of the CtrA signaling pathway arises due to the asymmetric

47 localization of two compositionally and functionally distinct signaling complexes (Lasker et al.,  
48 2016; Matroule et al., 2004). In pre-divisional cells the new cell pole signaling hub is composed  
49 of three scaffolding proteins (TipN (Huitema et al., 2006; Lam et al., 2006), PodJ (Hinz et al.,  
50 2003; Viollier et al., 2002) and PopZ (Bowman et al., 2008; Ebersbach et al., 2008)) and eight  
51 key signaling proteins (PleC, CpaE, DivL, DivK, PleD, PopA, MopJ and CckA) that function  
52 together to activate the CtrA pathway via phosphorylation (Lasker et al., 2016). The old cell pole  
53 is composed of two scaffolds (SpmX (Radhakrishnan et al., 2008) and PopZ) and three signaling  
54 proteins (DivJ, DivK and PleD) that work as a concerted system to deactivate CtrA through both  
55 dephosphorylation and proteolysis (Lasker et al., 2016). The positioning of these complexes  
56 prior to division ensures that the daughter cells differentially regulate CtrA and develop as  
57 unique cell-types (Figure 1A). Moreover, as newborn swarmer cells differentiate into stalked  
58 cells, their inherited PodJ-rich signaling hub undergoes compositional remodeling to become a  
59 SpmX-rich signaling hub (Figure 1A). Central questions remain regarding how *C. crescentus*  
60 cells establish, maintain and remodel cell polarity to coordinate asymmetric cell division with the  
61 cell-cycle.

62         The PopZ scaffolding protein plays a central role in organizing the two organelle-like  
63 signaling complexes, as it binds directly to seven client proteins (Holmes et al., 2016). However,  
64 PopZ is a common scaffold shared by both the new and old cell pole signaling hubs. This raises  
65 the question of how PopZ prevents mixing of signaling hubs when it switches from a monopolar  
66 to a bipolar localization pattern as cell develop from a swarmer cell into a pre-divisional cell  
67 (Figure 1A). Studies have shown that timing of new cell pole accumulation of PopZ is correlated  
68 with the initiation of replication (Laloux and Jacobs-Wagner, 2013; Mera et al., 2014). Studies  
69 have indicated that the coordination of cell cycle and cell polarity could be mediated by proteins

70 whose transcription is activated by DnaA and repressed by CtrA (Figure 1B) (Crymes et al.,  
71 1999). Two proteins contribute to PopZ bipolarization, ZitP (Berge et al., 2016) and TipN  
72 (Laloux and Jacobs-Wagner, 2013), however each of these studies suggest that redundant factors  
73 promote PopZ's new cell pole binding. One potential candidate protein is the new cell pole  
74 signaling scaffold PodJ, whose transcription upregulated at the same time as the initiation of  
75 replication (Figure 1B) (Crymes et al., 1999) and is proteolyzed prior to the swarmer-to-stalk  
76 transition (Chen et al., 2006; Curtis et al., 2012). Meanwhile, PodJ is required for establishment  
77 of cell polarity and asymmetric cell division (Hinz et al., 2003). PodJ directly or indirectly  
78 recruits the PleC kinase (Curtis et al., 2012; Hinz et al., 2003; Viollier et al., 2002), the pilus  
79 assembly protein CpaE (Viollier et al., 2002), and the ClpXP protease adaptor protein PopA  
80 (Duerig et al., 2009; Ozaki et al., 2014) to the new cell pole.

81         The PodJ scaffold domain architecture includes a N-terminal cytosolic domain composed  
82 of a coiled-coil rich region (Lawler et al., 2006) that is adjacent to an intrinsically disordered  
83 region (Figure 2A). The disordered region is comprised of two compositionally distinct sections.  
84 Residues 471-588 are rich in proline, serine and glutamic acid residues with a net charge of -18.  
85 While residues 589-642 are rich in serine, glycine and lysine residues with a net charge of +10.  
86 The C-terminal end passes through the membrane into the periplasm and contains a tetrapeptide  
87 co-repeat domain and a peptidoglycan binding domain (Lawler et al., 2006). The periplasmic  
88 domains coordinate pili biogenesis at the new cell pole and have been shown to be dispensable  
89 for PodJ localization at the cell pole (Lawler et al., 2006). PodJ's cytoplasmic domains have been  
90 implicated directly or indirectly with the recruitment of signaling proteins that activate the CtrA  
91 pathway (PleC (Curtis et al., 2012; Lawler et al., 2006; Viollier et al., 2002), DivL (Curtis et al.,  
92 2012)), initiate pili biogenesis (CpaE (Curtis et al., 2012; Viollier et al., 2002)) and localize the

93 holdfast complex (HfaB (Hardy et al., 2010)). Previous domain analysis has implicated a portion  
94 of the intrinsically disordered domain and the periplasmic domain in new cell pole targeting of  
95 PodJ (Lawler et al., 2006). However it remains unclear if this cell pole recruitment is dependent  
96 upon other polarity proteins (e.g. TipN or PopZ), and more broadly how the PodJ contributes to  
97 polarity establishment. Here we apply a combination of heterologous reconstitution experiments,  
98 genetics, quantitative cell biology and biochemical assays to map the regulatory interactions  
99 between three central scaffolding proteins (PopZ, PodJ and SpmX) that can account for exquisite  
100 cell polarity observed in asymmetrically dividing *C. crescentus* cells.

101

## 102 **Results**

### 103 ***PodJ expression level is critical for the maintenance of cell polarity***

104 Spatiotemporal PodJ protein abundance is highly regulated at the levels of transcription (Crymes  
105 et al., 1999) and proteolysis (Chen et al., 2006; Chen et al., 2005; Curtis et al., 2012) (Figure  
106 1B). Expression of sfGFP-PodJ at a 0.03% xylose induction level in a  $\Delta podJ$  strain resulted in  
107 PodJ accumulation at the new cell pole (Figure 1C and 1D). During the swarmer-to-stalked cell  
108 transition, the PodJ focus at the old cell pole diminished, while a new PodJ focus accumulated at  
109 the new cell pole (Figure 1C, Figure S1A, Movie S1). This localization pattern is consistent with  
110 previous immunofluorescence microscopy observations (Hinz et al., 2003; Viollier et al., 2002).  
111 In contrast, overexpression of PodJ resulted in cell filamentation and several small ectopic cell  
112 poles that were observed in 53% of cells (Figure 1E), each containing a PodJ focus (Figure 1E).  
113 These data indicate that strict regulation of PodJ protein expression levels in *C. crescentus* is  
114 critical for maintenance of cell polarity and rod morphology.

### 115 ***PodJ monopolar subcellular accumulation is dependent upon the old cell pole complex***

116 Live cell imaging of sfGFP-PodJ in  $\Delta popZ$ ,  $\Delta spmX$ ,  $\Delta tipN$  or  $\Delta pleC$  strains showed that PodJ  
117 accumulated at the cell poles in each of these deletion strain (Figure 2B). Therefore, PodJ  
118 accumulation as a focus was independent of other known scaffold proteins. However, we did  
119 observe that PodJ subcellular position was dependent upon PopZ or SpmX, as the percentage of  
120 cells containing monopolar PodJ significantly reduced from 82% in wild-type cell to 35% for  
121  $\Delta popZ$ , and 9% for  $\Delta spmX$  (Figure 2B). Because deletion of *spmX* results in long-chain cell  
122 phenotype in *C. crescentus* (Radhakrishnan et al., 2008), the accumulated PodJ foci also  
123 occupied each constriction sites. Collectively, these results suggest that PodJ accumulation as a  
124 focus is independent of other known scaffold proteins. However, the subcellular positioning of  
125 PodJ is dependent directly or indirectly upon the scaffolding proteins PopZ and SpmX.

126 ***PodJ accumulates at the cell poles in E. coli independent of specific C. crescentus proteins***

127 To further test if PodJ subcellular accumulation was independent of other *C. crescentus*  
128 specific factors, we heterologously expressed PodJ in *Escherichia coli* BL21 cells. Notably, the  
129  $\gamma$ -proteobacterium *E. coli* is highly divergent from the  $\alpha$ -proteobacterium *C. crescentus* and does  
130 not contain any clear homologs of the *C. crescentus* scaffolding proteins or new cell pole  
131 signaling proteins. YFP-PodJ accumulated at both cell poles in *E. coli* (Figure 2C), suggesting  
132 that PodJ cell pole accumulation was independent of known *C. crescentus* polarity proteins. Co-  
133 expression of YFP-PodJ together with inclusion body marker IbpA-mCherry (Lindner et al.,  
134 2008) demonstrated that PodJ did not co-localize with inclusion bodies in *E. coli* (Figure S3B).  
135 Moreover, YFP-PodJ localized as a bipolar pattern in about 80% of *E. coli* cells (Figure 2C),  
136 which differs from its monopolar localization pattern in *C. crescentus*. These results suggest that  
137 possible negative or positive regulators may promote the monopolar accumulation of PodJ in *C.*  
138 *crescentus*.

139 To identify a minimal cell pole accumulating domain, we screened a set of 21 PodJ domain  
140 deletion variants for their capabilities to maintain cell pole accumulation (Figure 2D, Figure S2).  
141 Amongst this set, the construct representing the PerP-cleaved form of PodJ that lacks the  
142 periplasmic domains, PodJ $\Delta$ peri, accumulated at the cell poles similar to the wild-type PodJ in *E.*  
143 *coli* (Figure 2D), consistent with earlier studies (Lawler et al., 2006). Deletion of the intrinsically  
144 disordered PSE-rich region or CC4-6 does not affect PodJ subcellular accumulation (Figure S3).  
145 In contrast, the PodJ localization pattern gradually changed from bipolar to diffuse when we  
146 truncated the coiled-coil (CC) domains 1 to 3 (Figure 2D), indicating that residues 1-249 were  
147 critical for cell pole accumulation of PodJ.

#### 148 ***PodJ self-assembled into a high order oligomer in vitro***

149 Since PodJ accumulated at the cell poles independent of other known scaffolding proteins *in*  
150 *vivo*, we hypothesized that PodJ is a self-assembled protein. We therefore purified the  
151 cytoplasmic portion of PodJ, PodJ(1-635), and analyzed the protein through native gel analysis  
152 (Figure 2F). The result showed PodJ oligomerization into an array of large oligomeric complexes  
153 ranging in size from 720-1048 kDa. Further analytical size exclusion chromatography of PodJ(1-  
154 635) indicated PodJ oligomers ranging in size from: 71 kDa (monomer), 194 kDa (dimer), and >  
155 650 kDa (> 8-mer) (Figure 2G). These results indicate that PodJ is a self-assembled scaffolding  
156 proteins, and that subcellular localization may be dependent upon coiled-coil multivalent  
157 interactions.

#### 158 ***PodJ is the central organizer of new cell pole assembly***

159 Previous studies have suggested that PodJ could serve as a scaffolding protein as PleC (Viollier  
160 et al., 2002), CpaE (Ozaki et al., 2014; Viollier et al., 2002), and PopA (Ozaki et al., 2014)) all  
161 require PodJ for subcellular accumulation. However, it remains elusive if these dependencies are

162 due to a direct or indirect recruitment by PodJ. To address these questions, we screened 17 cell-  
163 cycle regulatory proteins (Figure S2A) for their capacity to co-localize with PodJ upon  
164 heterologous co-expression in *E. coli*. Three predicted PodJ interaction partners (PleC, CpaE,  
165 and PopA) exhibited mostly diffused pattern when expressed alone, but co-localized with PodJ at  
166 the cell poles when co-expressed (Figure 3A, 3B). Three other proteins (SpmX, FtsZ, and TipN)  
167 disrupted the PodJ localization pattern when co-expressed with them in *E. coli* (Figure S3C),  
168 suggesting they could serve as a negative regulator of PodJ localization. We were unable to  
169 detect any direct interactions between PodJ and the following new cell pole signaling proteins:  
170 DivL, DivK, CckA, ParA, ParB, and PleD (Figure S3D, Figure 3B). These results support a  
171 model of PodJ as a scaffold protein that directly recruits at least three client proteins: PleC, CpaE  
172 and PopA.

173         Amongst these proteins, the positioning of PleC at the new cell pole is critical for  
174 activation of the CtrA signaling pathway and generation of a CtrA signaling gradient (Chen et  
175 al., 2011; Matroule et al., 2004). Two regions of PodJ which contribute additively to the  
176 localization of PleC: the C-terminal peptidoglycan binding domain (residues 921-974) and  
177 residues 589-639 (Curtis et al., 2012; Lawler et al., 2006). Through the *E. coli* heterologous co-  
178 expression assay (Figure S4) we observed that PleC could co-localize robustly with a PodJ  
179 variant lacking the C-terminal periplasmic region (PodJ $\Delta$ 703-974, Figure 3C). Deletion of either  
180 the N-terminal (PodJ $\Delta$ 471-588) or the C-terminal (PodJ  $\Delta$ 589-642) disordered region resulted in  
181 a loss of PleC co-localization in *E. coli* (Figure 3C). These results suggest that the entire  
182 disordered region of PodJ serves as a binding site for PleC and may be involved in weak  
183 multivalent interactions with this domain. Moreover, we demonstrated that *C. crescentus* cells  
184 that express PodJ $\Delta$ PSE as a sole copy display a diffuse PleC subcellular localization pattern in a



185 manner similar to the  $\Delta podJ$  strain (Figure 3D). We next tested if the negatively charged  
186 disordered region could be substituted with other disordered proteins, by replacing PodJ's PSE  
187 domain with PopZ's disordered PED-rich domain. A similar diffuse pattern of PleC was  
188 observed in *E. coli* when we swapped the PodJ PSE-rich disordered region with the disordered  
189 PED-rich region from PopZ (Holmes et al., 2016) (Figure 3C). Therefore, our results emphasized  
190 the PSE domain likely presents a specific site for recruitment of PleC client proteins.

191 We fluorescently labeled PodJ\_PSE domain with a BODIPY dye and measured binding  
192 via a fluorescence polarization assay by mixing 16  $\mu$ M of PleC sensory domain with 100 nM of  
193 BODIPY-PodJ\_PSE. As shown in Figure 3E, PodJ\_PSE bound selectively to PleC, however did  
194 not bind to other signaling proteins (e.g. CckA and DivL) that co-localize at the new cell pole.  
195 In summary, by integrating our studies together with previous work from PopZ (Holmes et al.,  
196 2016), DivL (Mann and Shapiro, 2018; Tsokos et al., 2011), and CckA (Biondi et al., 2006), we  
197 have mapped out a localization dependency hierarchy that implicates two scaffolds, PodJ and  
198 PopZ, as nucleating factors for new cell pole assembly (Figure 3F).

### 199 ***PodJ nucleates PopZ assembly at the new cell pole in C. crescentus***

200 PopZ plays a critical role in the predivisional cell polarity establishment by switching from a  
201 monopolar to bipolar localization (Bowman et al., 2010; Ptacin et al., 2014) and recruiting core  
202 CtrA regulatory proteins: DivL, CckA, and ChpT (Holmes et al., 2016). We tested if PopZ  
203 accumulation at the new cell pole was PodJ dependent in *C. crescentus*. We observed that in the  
204  $\Delta podJ$  strain, there was a 4-fold reduction in the fraction of mCherry-PopZ signal at the new cell  
205 pole versus wild-type strains (Figure 4A, 4B). Notably, robust PopZ accumulation at the new cell  
206 pole could be rescued when sfGFP-*podJ* was expressed from the chromosomal xylose locus  
207 (Figure 4A-D). To examine the distribution of mcherry-PopZ during the cell cycle, we

208 performed a series of time-lapse microscopy experiments starting with a synchronized  
209 population of swarmer cells (Figure 4C). Images were acquired every one minute and  
210 kymographs were constructed to show the fluorescence intensity along the cell body over time.  
211 In wild-type cells, robust mCherry-PopZ foci accumulates at the new cell pole approximately 40  
212 minutes post-synchrony (Figure 4C, movie 2). However, in a  $\Delta podJ$  strain the vast majority of  
213 cells (90%, Figure 4D) proceed through cell division without accumulating any detectable PopZ  
214 at the new cell pole (Figure 4C, movie 3). Quantitative analyses in Figure 4D show that the  
215 proportion of the cells containing bipolar PopZ reaches the highest of ~80% at 105-minute post-  
216 synchrony for wild-type and  $podJ^+$  cells, comparing to the highest of 10% in  $\Delta podJ$  cells.  
217 Collectively, these results show that PodJ is required for robust PopZ accumulation at the new  
218 cell pole in *C. crescentus*. A subpopulation that does accumulate at the new cell pole implicates  
219 redundant factors such as TipN(Laloux and Jacobs-Wagner, 2013) and ZitP(Berge et al., 2016)  
220 assist in PopZ recruitment at the new cell pole.

### 221 ***In the absence of PodJ, the cell polarity axis is randomized***

222 In wild-type cells, PopZ accumulation at the new cell pole prior to cell division ensures that  
223 swarmer daughter cell inherit a PopZ signaling complex that maintains CtrA activation and  
224 prevents chromosome replication. In contrast, within the  $\Delta podJ$  strain, the disability of PopZ to  
225 accumulate at the new cell pole led to 86% (82 out of 95 cells) of swarmer daughter cells void of  
226 PopZ (Figure 4E, Figure S4). In these cells, nascent PopZ is accumulated as monopolar focus  
227 approximately 60 minutes after cell division (Figure 4C). In *C. crescentus*  $\Delta podJ$  strain, time-  
228 lapse analysis showed that in 91% of cells, PopZ accumulates at the same pole as in the wild-  
229 type strain (Figure 4F). However, in the other 9% of cells, PopZ accumulates at the opposite cell  
230 pole, disrupting the inherited cell polarity axis. These results indicate that PodJ is required to

231 strictly maintain the inherited polarity axis for the newborn swarmer cells, and that other possible  
232 polarity factors (*e.g.*, SpmX or ParB) likely facilitate proper subcellular recruitment of nascent  
233 PopZ.

234 ***CtrA pathway activation requires new cell pole assembly***

235 Establishment of the new cell pole signaling complex is required for activation of the  
236 CtrA signaling pathway and repression of chromosome replication. Previous studies revealed  
237 that several new cell pole signaling proteins that promote CtrA phosphorylation (DivL, CckA,  
238 and PleC) displayed reduced accumulation at the new cell pole in the  $\Delta$ PodJ strain (Curtis et al.,  
239 2012). Here we have shown that PodJ is a direct binding partner for PleC (Figure 3) and PopZ  
240 (Figure 4), which recruits the DivL/CckA complex (Holmes et al., 2016). To investigate the  
241 impact of new cell pole signaling hub disruption from the  $\Delta$ PodJ strain, we examined the impact  
242 upon the CtrA signaling pathway activation by flow cytometry analysis of exponentially growing  
243 *WT* and  $\Delta$ *podJ* cells stained with the nucleic acid dye SYTOX Green. Phosphorylated CtrA  
244 serves as a direct inhibitor of chromosome replication resulting in a tightly regulated cell  
245 population that contains either one or two chromosomes. A lower 1N:2N chromosome ratio was  
246 observed in  $\Delta$ *podJ* cultures compared with *WT*, as well as a substantial increase in cells with  
247 three or more chromosomes (Figure 4G). These results indicate that PodJ's scaffolding functions  
248 at the new cell pole promote CtrA signaling pathway activation.

249

250 ***PopZ binds directly to coiled-coil region 4-6 of PodJ***

251 To determine if PopZ and PodJ interact directly, we heterologously expressed fluorescent protein  
252 fusions of PodJ and PopZ in *E. coli*. As shown in Figure 5A and 5B, mCherry-PopZ accumulates  
253 at a single cell pole when it is expressed alone, while PopZ co-localizes in a bipolar pattern when  
254 co-expressed with YFP-PodJ. To determine the PopZ binding site within PodJ, we screened the  
255 capability of PopZ to bind to the library of PodJ domain deletion variants through co-expression  
256 in *E. coli* (Figure 5C, Figure S2). We used the following screening criteria to characterize PopZ  
257 interaction with the PodJ variants: (a) the two proteins are 100% co-localized and (b) the  
258 monopolar localization pattern of PopZ is changed after co-expression. We found that deletion of  
259 the C-terminal periplasmic domain or the intrinsically disordered PSE domain in PodJ did not  
260 disrupt the PodJ-PopZ interaction (Figure 5C, S2). In contrast, deletion of its CC4-6 domains  
261 disrupted PopZ co-localization with PodJ. We then expressed YFP-CC4-6 alone and observed  
262 that it was dispersed through the cytoplasm in *E. coli*. However, mCherry-PopZ was able to  
263 recruit it to the cell pole when co-expressed them in *E. coli*. These data indicate that coiled-coil  
264 4-6 in PodJ functions as a PopZ recruitment site (Figure 5C).

265 To confirm this PopZ-PodJ protein-protein interaction is direct, we purified the  
266 PodJ\_CC4-6 protein with a cysteine incorporated after the hexahistidine purification tag and  
267 fluorescently labeled it as with PodJ\_PSE. A fluorescence polarization assay was employed to  
268 detect a binding interaction between PodJ and PopZ by mixing 16  $\mu$ M PopZ together with 100  
269 nM BODIPY-PodJ\_CC4-6, using the same amount of BODIPY-PodJ\_PSE as a control. As  
270 shown in Figure 5D, PopZ bound to PodJ\_CC4-6, but did not bind to PodJ\_PSE. Taken together,  
271 the *E. coli* heterologous expression assays and *in vitro* biochemical assays show that coiled-coil  
272 4-6 region of PodJ is the site of interaction with PopZ (Figure 5E). Moreover, we propose this

273 PodJ-PopZ interaction plays a critical role in maturation of the new cell pole signaling hub  
274 (Figure 4A-F) and transcriptional regulation of PodJ(Crymes et al., 1999) coordinates this event  
275 with chromosomal replication (Figure 5E).

276 ***SpmX is a negative regulator of PodJ accumulation at the cell poles.***

277 Our PodJ overexpression experiments (Figure 1D) and *E. coli* reconstitution experiments (Figure  
278 2C) suggest that PodJ has an affinity for both cell poles. But how does PodJ exclusively bind and  
279 recognize the new cell pole in *C. crescentus*? Eukaryotic cell polarity networks are characterized  
280 by inhibitory regulatory interactions between the asymmetrically partitioned complexes to ensure  
281 robust cell polarization (Chau et al., 2012). Based upon these eukaryotic polarity networks, we  
282 hypothesized that proteins that reside at the old cell pole (*e.g.*, SpmX or DivJ) might play a role  
283 as a negative regulator of PodJ subcellular accumulation (Chau et al., 2012). We found that  
284 overexpression of SpmX resulted in a significant reduction of PodJ at the cell poles compared to  
285 that in wild-type cells (Figure 6A, 6C). In contrast, sfGFP-PodJ accumulated at all cell poles  
286 including constricted mid-cell curved sites in  $\Delta$ *spmx* mutant strains (Figure 6B, 6C). These  
287 results suggest that SpmX is a negative regulator of PodJ accumulation at the cell poles either  
288 directly or indirectly.

289 We further examined if SpmX could disrupt PodJ subcellular accumulation at the cell  
290 poles when co-expressed in *E. coli* (Figure 6D). Consistent with previous studies (Holmes et al.,  
291 2016; Perez et al., 2017), SpmX expression alone is diffuse in *E. coli*. PodJ itself accumulates at  
292 the cell poles however co-expression of SpmX and PodJ together resulted in dispersion of the  
293 PodJ (Figure 6D). These results suggested that PodJ and SpmX interact directly and that  
294 dispersal of PodJ from the cell poles depends on the increase of SpmX protein level, consistent

295 with the up-regulation of SpmX at the G1 transition phase in *C. crescentus* (Radhakrishnan et al.,  
296 2008; Schrader et al., 2016) (Figure 1A).

### 297 ***SpmX interacts with the CC4-6 and PSE-rich domains of PodJ***

298 To determine the SpmX interaction domain, we co-expressed a library of PodJ domain deletions  
299 in *E. coli* with a SpmX variant lacking the transmembrane domains, hereafter called SpmX'.  
300 While full-length SpmX is disperse throughout the cytoplasm, SpmX' accumulates at both cell  
301 poles. We observed that co-expression of PodJ with SpmX' resulted in PodJ $\Delta$ CC4-6 foci  
302 accumulation away from the cell poles. When the PodJ CC4-6 variant is expressed by itself in *E.*  
303 *coli* it was diffuse (Figure 6E, 6F), however SpmX' is capable of recruiting PodJ CC4-6 to the  
304 cell poles. This result indicates that SpmX' binds directly to coiled-coil 4-6 region of PodJ. We  
305 then more closely examined the role of PodJ's PSE domain in the PodJ-SpmX interaction. Upon  
306 SpmX co-expression with PodJ $\Delta$ PSE we observed that the two proteins co-localized at the cell  
307 poles without any observed dispersal from the cell poles. We also observed that expression of the  
308 PSE-rich domain by itself could disperse SpmX from the cell poles in *E. coli*. These data indicate  
309 that SpmX dependent dispersion of PodJ also requires the PSE domains. As the CC4-6 and PSE  
310 domains are adjacent to one another they may work collectively to regulate the PodJ-SpmX  
311 interaction.

312 To confirm PodJ and SpmX interact directly, we purified SpmX', and employed the  
313 fluorescence polarization assay to detect the interaction between SpmX' and the BODIPY-  
314 PodJ\_CC4-6 or BODIPY-PodJ\_PSE. As shown in Figure 6G, SpmX' interacted with both  
315 BODIPY-PodJ\_CC4-6 and BODIPY-PodJ\_PSE. Interestingly, the consequences of these two  
316 binding interactions are distinct: SpmX binding to CC4-6 region results in co-localization, while  
317 SpmX binding to the PSE-domain results in PodJ and SpmX dispersal from the cell poles.

318 ***PodJ interactions with PopZ and SpmX are required for robust cell polarity***

319 Our experiments suggest a 3-node protein-protein interaction circuit in which PodJ promotes  
320 PopZ new cell pole accumulation (Figure 4), PopZ promotes SpmX subcellular  
321 accumulation (Perez et al., 2017), and SpmX negatively regulates PodJ subcellular accumulation  
322 (Figure 6). We introduced PodJ variants as a sole copy into *C. crescentus* that would individually  
323 disrupt the proposed regulatory interactions and evaluated their impact upon *C. crescentus* cell  
324 polarity: PodJ $\Delta$ peri, PodJ $\Delta$ CC4-6 and PodJ $\Delta$ PSE. When sfGFP-PodJ $\Delta$ PSE is expressed as a sole  
325 copy in *C. crescentus*, we observed that sfGFP-PodJ $\Delta$ PSE and mCherry-PopZ accumulates at  
326 both cell poles in predivisional cells (Figure 7A). This indicates the PSE domain in PodJ, the site  
327 of PodJ-SpmX interaction, is critical for PodJ to be excluded from the old cell pole. When  
328 sfGFP-PodJ $\Delta$ CC4-6 is expressed as a sole copy in *C. crescentus*, we found that PopZ-mCherry is  
329 poorly localized at the new cell pole (Figure 7A), similar to the observation that was found in  
330  $\Delta$ podJ (Figure 4B). Therefore, deletion of CC4-6 disrupts polarity through loss of PopZ  
331 recruitment at the new cell pole. In contrast, sfGFP-PodJ $\Delta$ peri construct mirrors wild-type like  
332 cell polarity (Figure 7A) as it contains critical regulatory interactions with PopZ and SpmX.

333 To our surprise, we observed that sfGFP-PodJ $\Delta$ CC4-6 is secreted from the stalked pole in  
334 wild-type cells (Figure S7, Figure 7A). However, this abnormal phenotype can be restored by  
335 deleting *spmX* (Figure S7). Moreover, besides dispersal of intracellular PodJ, overexpression of  
336 SpmX also resulted in secretion of PodJ foci from the cell (Figure 6A, Movie S4), indicating  
337 SpmX plays a role in secretion of PodJ. Similar secretion phenotype was observed when  
338 expression sfGFP-PodJ after deletion of PopZ (Figure S7), suggesting that PopZ anchors PodJ in  
339 the cytoplasm and prevents this abnormal secretion process. To exclude the possibility that PodJ  
340 is excreted due to cell lysis, we confirmed sfGFP-PodJ by western blot analyses of the media

341 supernatants with anti-GFP antibody, using the intracellular CtrA protein as a negative control  
342 (Figure S7). These results collectively suggest that SpmX plays a negative regulatory role in  
343 dispersing PodJ from the old cell pole, a function that we propose is critical for the new-to-old  
344 cell pole remodeling that triggers swarmer-to-stalk cell differentiation (Figure 7B).

345

## 346 **Discussion**

347 Here we have shown that the protein-protein interactions between three scaffolding proteins  
348 function together as a circuit to establish and maintain polarity in *C. crescentus*. Using a  
349 synthetic biology reconstitution approach, we have identified the localization hierarchy at the  
350 new cell pole by demonstrating that PodJ recruits three client proteins (PleC, CpaE, PopA), and  
351 the central organizing scaffold PopZ. In turn, this allows PopZ to recruit its direct binding  
352 partners (DivL, CckA) to the new cell pole (Figure 3F) (Holmes et al., 2016). Thus the PodJ  
353 scaffold promotes the colocalization of PleC together with the PopZ/DivL/CckA signaling  
354 complex to promote CtrA pathway activation (Figure 4G). To trigger asymmetric accumulation  
355 of PodJ, our studies have also revealed that the old cell pole scaffold SpmX promotes localized  
356 foci disassembly and an unexpected stalked pole specific secretion process (Figure 6-7). Taken  
357 together we propose that this scaffold network topology composed of both positive feedback and  
358 negative regulations between signaling hubs promotes robust cell polarization (Figure 7).

### 359 ***PodJ serves as a central node in the new cell pole signaling hub localization hierarchy***

360 Prior to this study it was known that several factors accumulate at the new cell pole (Curtis and  
361 Brun, 2010; Lasker et al., 2016), however the localization dependency within this new cell pole  
362 signaling hub was unclear. We confirmed that three protein-protein interactions with the client  
363 proteins CpaE, PleC and PopA were direct. Most critically, we discovered a direct PodJ-PopZ



364 interaction that further triggers accumulation of PopZ binding proteins (DivL and CckA). In the  
365 absence of PodJ, the PopZ scaffold still can accumulate at the new cell pole in a fraction of cells  
366 (Figure 4), consistent with contribution of other redundant factors such as ZitP(Berge et al.,  
367 2016) and TipN(Laloux and Jacobs-Wagner, 2013). These studies indicate that the PodJ  
368 scaffold serves as a central organizer of the new cell pole development (Figure 3F). Key  
369 questions remain as to the mechanism of how this nucleating factor targets the cell poles? Our  
370 studies indicate that oligomerization of PodJ (Figure 2) may allow PodJ to recognize micron  
371 sized curvature differences (Huang and Ramamurthi, 2010) or interact with shared cell wall  
372 components between *C. crescentus* and *E. coli* such as the Tol-Pal membrane integrity complex  
373 (Yeh et al., 2010), pili and flagellar assemblies.

374

### 375 ***SpmX prevents symmetric PodJ localization***

376 A key aspect of eukaryotic cell polarity circuits are regulatory interactions between partitioned  
377 complexes(Chau et al., 2012). Our studies have revealed that SpmX is a novel negative regulator  
378 of PodJ localization. Deletion of SpmX results in accumulation of PodJ at all highly curved  
379 regions of the cell (Figure 6A) while overexpression of SpmX results in dispersion of PodJ from  
380 the cell poles and an unexpected localized secretion of PodJ at the stalked cell pole (Figure 6A,  
381 Figure S7(Grangeon et al., 2015)). We propose that this local PodJ dispersal functions may play  
382 a role in compositional remodeling of the PodJ-rich signaling hub into a SpmX-rich signaling  
383 hub that occurs in the swarmer-to-stalked cell differentiation (Figure 7B).

384 PodJ domain analysis indicates that SpmX binds to two PodJ domains: CC4-6 and the  
385 intrinsically disordered PSE-rich domain. The biophysical mechanism of this foci disassembly  
386 process remains unclear, and one possible model is that PodJ-SpmX complex forms small

387 oligomers incapable of cell pole recognition. We speculate that the SpmX-PodJ regulatory  
388 interactions may share broad mechanistic similarities with the MipZ-FtsZ (Thanbichler and  
389 Shapiro, 2006) and (MinD-FtsZ) (Park et al., 2018) interactions that prevent FtsZ accumulation  
390 at the cell poles and direct FtsZ to the mid-plane. However, extensive future *in vitro* studies will  
391 be needed to fully understand this dispersal mechanism. As well, we anticipate that SpmX likely  
392 mediates other cell pole remodeling mechanisms indirectly which will require future genetic  
393 studies to identify new regulatory partners and interactions. It also remains to be seen if co-  
394 localization of PodJ, the ClpXP adaptor protein PopA and ClpXP promote the final stages of  
395 PodJ's proteolysis at the old cell pole to promote asymmetric localization.

396

397 ***Cell polarity is achieved though polarity circuits with common network topology throughout***  
398 ***all kingdoms of life***

399 The PopZ-SpmX-PodJ polarity circuit is conserved within a subset of  $\alpha$ -proteobacteria, and  
400 recent studies of have revealed genetic interactions between PodJ and PopZ in *Agrobacterium*  
401 *tumefaciens* (Anderson-Ferguson et al., 2016; Grangeon et al., 2015), however the subcellular  
402 localization pattern of these proteins diverges from that observed in *C. crescentus* (Anderson-  
403 Ferguson et al., 2016; Ehrle et al., 2017; Grangeon et al., 2015; Howell et al., 2017). In *A.*  
404 *tumefaciens*, the polarity is inverted compare to *C. crescentus* as PopZ resides exclusively at the  
405 new cell pole and PodJ occupies the old cell pole (Grangeon et al., 2015). Moreover, a second  
406 subset of  $\alpha$ -proteobacteria species encode the PopZ scaffolding protein and the PleC and CckA  
407 histidine kinases, however their genomes contain no clear homologs of the PodJ or SpmX  
408 scaffolding proteins. These variations in conservation suggest that that the PopZ-SpmX-PodJ  
409 polarity network may have been re-wired to include new regulatory interactions and new

410 regulators to support diverse modes of bacterial cell development observed throughout  $\alpha$ -  
411 proteobacteria (Ettema and Andersson, 2009).

412 More broadly, polarity networks are remarkably diverse at the biomolecular level and are  
413 utilized throughout all kingdoms of life. *C. crescentus* orchestrates cell polarity through a  
414 network architecture that contains positive feedback through formation self-assembled  
415 scaffolding proteins. With positive feedback alone, PodJ self-assembles or binds to cell pole  
416 binding sites nearly equally well at each cell pole. In this study we have critically examined the  
417 inter-relationships between three scaffolds that promote *C. crescentus* cell polarity. Based upon  
418 these studies we propose a model that compositional control of the new and old cell pole  
419 signaling hubs is promoted by local disassembly of PodJ at the old cell pole by a PodJ foci  
420 inhibitor protein SpmX (Figure 7B). Remarkably, this network topology of positive feedback  
421 coupled with inhibition is similar to minimal polarity circuit architectures identified using a  
422 synthetic biology approach in yeast (Chau et al., 2012). This synthetic biology approach  
423 characterizing several network architectures suggested that mutual inhibition networks yielded  
424 the most robust cell polarization (Chau et al., 2012). Therefore, we anticipate future research will  
425 identify several negative regulatory interactions between the new and old cell pole signaling  
426 hubs to ensure robust *C. crescentus* cell polarization.

427

## 428 **Figure Captions**

429 **Figure 1: The scaffolding protein PodJ recognizes the new pole and is involved in cell**  
430 **polarity establishment.** (A) Schematic of cell polarity establishment and cell cycle regulation in  
431 *Caulobacter crescentus*. Swarmer cells differentiate into stalked cells, which is correlated with  
432 cell pole remodeling of a PodJ-rich signaling hub (green) into a SpmX-rich signaling hub (red).

433 In stalked cells, after initiation of replication a PodJ-rich signaling hub accumulates at the new  
434 cell pole. Cell division results in a swarmer cell that involved unequal inheritance of a PodJ-rich  
435 signaling hub in swarmer cells and a SpmX-rich signaling hub in stalked cells. (B) Two key  
436 cell-cycle regulators, CtrA and DnaA, co-regulate the initiation of replication and the  
437 transcription of PodJ and a PodJ specific protease PerP (C and D) Time-lapse microscopy  
438 analyses show PodJ accumulates at the new cell pole during the cell cycle. Kymographs of  
439 sfGFP-PodJ signal along the cell length over time after the synchronization of WSC1201  
440 swarmer cells, images were acquired every 2 min. (E) Constitutive overnight PodJ  
441 overexpression (0.3% xylose) causes formation of ectopic cell poles that are co-localized with  
442 PodJ foci. Two representative cells are shown. All bars, 2  $\mu$ m.

443

444 **Figure 2: PodJ is a self-assembled protein, whose monopolar accumulation is dependent**  
445 **upon PodJ and SpmX.** (A) PodJ domain organization predicted by HHpred and adapted from  
446 previous studies(Curtis et al., 2012; Lawler et al., 2006) The coiled-coil rich region was analyzed  
447 by PCOILS and modeled with MODELLER. The probability of intrinsic disorder over the  
448 primary sequence of PodJ (red line), represented as the average scores from four disorder  
449 prediction algorithms: Meta disorder MD2, SPOT, Cspritz\*2, and MFDp2. (B) PodJ  
450 accumulation as a concentrated focus in *C. crescentus* cells is independent of TipN, PleC, PopZ  
451 and SpmX. However, PodJ monopolar subcellular accumulation is dependent upon the PopZ  
452 and SpmX scaffolds. (C) Subcellular localization of PodJ when heterologously expressed YFP-  
453 PodJ in *E. coli*. (D) Heterologous expression of YFP-PodJ variants in *E. coli* reveals that the N-  
454 terminal coiled-coil region 1-3 is critical for accumulation of PodJ at the cell poles. (E) The  
455 signal of YFP-PodJ along the cell length was plotted for the cells shown in Figure 2D. All of the

456 data was normalized with the highest intensity in each strain setting as 100%. (F) Purified  
457 PodJ(1-635) was analyzed *in vitro* via native gel analysis. The protein is subjected to  
458 nondenaturing gel electrophoresis at 4°C and subsequently stained with Coomassie blue stain.  
459 Four distinct bands indicate PodJ oligomers larger 480 kDa. (G) Analytical size exclusion  
460 chromatography was used to measure the apparent molecular mass of purified PodJ(1-635)  
461 (black line), by plotting absorbance at 215 nm versus elution volume. The indicated molecular  
462 masses of each peak were determined by comparison to the elution volume of protein standards  
463 (grey lines). A representative trace is shown from three independent replicates.

464

465 **Figure 3: PodJ is a central organizer of the new cell pole signaling hub.** The interactions  
466 between PodJ and binding partners were evaluated through heterologous co-expression in *E. coli*.  
467 (A) YFP-PodJ exhibits selective recruitment roles for the *C. crescentus* new cell pole proteins  
468 that include PleC, PopA and CpaE. (B) The polar recruitment ability by PodJ was calculated and  
469 normalized as a relative localization index. (C) Co-expression of PodJ variants together with  
470 PleC reveals that the intrinsically disordered PSE-rich domain is necessary for PleC recruitment  
471 to the cell pole in *E. coli*. (D) Expression of PodJ variants as a sole-copy in *C. crescentus*  
472 revealed that the PSE-rich domain is required for PleC accumulation at the new cell poles. (E)  
473 Fluorescence polarization binding assay confirms PodJ directly interaction with PleC. 100 nM  
474 BODIPY dye labeled PodJ\_PSE mixed with the following new cell pole proteins at 10 µM  
475 PopZ, PleC, CckA and DivL. PodJ\_PSE specifically binds to PleC. (G) New cell pole  
476 localization hierarchy based upon these studies indicate that PodJ is a central organizer in  
477 addition to PopZ(Holmes et al., 2016) for the new cell pole signaling hub. Interactions identified  
478 in this study (red), and those discovered previously by Holmes et al. (blue)(Holmes et al., 2016).

479  
480 **Figure 4: PodJ nucleates PopZ assembly at the new cell pole and is required for robust**  
481 **inheritance of PopZ in daughter swarmer cells.** (A) mCherry-PopZ localization in  
482 predivisional cells in the wild-type (bipolar) versus the *podJ* deletion *C. crescentus* (monopolar).  
483 Bars, 2  $\mu$ m. (B) Population analysis reveals a substantial reduction of PopZ abundance at the new  
484 cell pole of  $\Delta podJ$  predivisional cells. Cell poles (new or old) were distinguished and orientated  
485 manually by observation of a stalk. The signal intensity was normalized with the highest value as  
486 100% in each strain. (C) Kymograph analyses of mCherry-PopZ signal over the time after the  
487 synchronization of WT,  $\Delta podJ$  and *podJ* complementary cells. Vanillate (50 mM) for mChy-  
488 PopZ induction and xylose (0.03%) for sfGFP-PodJ induction were added at 1 hr prior to  
489 synchronization of the cell culture. Images were acquired every 1 min. One of three  
490 representative cells were shown for each strain. The results indicate that PopZ fails to robustly  
491 accumulate at the new cell poles prior to cell division in  $\Delta podJ$  strain. (D) Quantification of the  
492 percentage of cells that display detectable bipolar PopZ after cell synchronization. Time course  
493 analyses were performed within 135 mins in PYE medium for WT,  $\square podJ$  and *podJ*  
494 complementary cells (more than 130 cells were calculated for each point). Robust PopZ  
495 assembly at the new cell pole is dependent upon PodJ. (E and F) Failure to localize mcherry-  
496 PopZ to the new cell pole in  $\Delta podJ$  results in ~80% population of swarmer cells that fail to  
497 inherit PopZ. Within a subpopulation of swarmer cells (9% of cells), nascent PopZ accumulates  
498 at the incorrect cell pole switching the inherited polarity axis. A total of 40 cells were tracked by  
499 time-lapse analyses. (G) Flow cytometry analysis of wild-type versus  $\Delta podJ$  strains. When *podJ*  
500 is deleted from cells (red line), cells display a decrease in 1N and 2N cells that is accompanied  
501 with an increase in 3N and 4N cells.

502

503 **Figure 5: PopZ binds directly to the coiled-coil 4-6 region of PodJ.** (A) Heterologous  
504 expression of YFP-PodJ and mcherry-PopZ in *E. coli*. Co-expression with PodJ causes bipolar  
505 PopZ accumulation in *E. coli*. (B) Mean protein intensity of YFP-PodJ and mcherry-PopZ versus  
506 cell length (n=370). The signal intensity was normalized with the highest value as 100% in each  
507 strain. (C) Co-expression of PodJ variants together with PopZ in *E. coli* reveals that the coiled-  
508 coil 4-6 region in PodJ is necessary for the interaction with PopZ. (D) Fluorescence polarization  
509 binding assay of the BODIPY dye labeled PodJ\_PSE or PodJ\_CC4-6 mixed with 10  $\mu$ M PopZ,  
510 using BSA as a negative control. PopZ binds specifically to the CC4-6 domain of PodJ, however  
511 does not bind to its PSE-rich domain (E) Model for PodJ serving as a new cell pole development  
512 signal that triggers polarity establishment upon the initiation of replication, through its cell-cycle  
513 coordinated expression and specific interaction with the PopZ scaffold. All bars, 2  $\mu$ m.

514

515 **Figure 6: SpmX is a negative regulator for cell pole accumulation of PodJ.** (A) SpmX  
516 directly or indirectly regulates PodJ subcellular localization in *C. crescentus*. Overexpression of  
517 SpmX results in a reduction of cell pole localized PodJ and secretion of PodJ from cells. (B) In  
518 the absence of SpmX, PodJ accumulates at all poles in *C. crescentus*. (C) Quantitative analysis of  
519 PodJ localization in *C. crescentus* predivisional cells in wild-type,  $\Delta$ *spmX* and SpmX  
520 overexpression strains. (D) Heterologous expression of YFP-PodJ alone results in bipolar PodJ  
521 accumulation, while expression of SpmX-mcherry alone is disperse in *E. coli*. (E) Co-expression  
522 of PodJ together with SpmX causes PodJ to disperse from the cell poles in *E. coli*. All bars, 2  
523  $\mu$ m. (F) Co-expression of PodJ variants together with a SpmX variant lacking the transmembrane  
524 domain (SpmX'). These analyses indicate that SpmX's dispersal of PodJ requires the PSE and

525 CC4-6 domains of PodJ. (G) *In vitro* fluorescence polarization assays screening the binding  
526 interactions between SpmX and Bodipy labeled PodJ-PSE domain and PodJ-CC4-6 domains.

527

528 **Figure 7: A network of protein-protein regulatory interactions enable polarity**

529 **establishment in *C. crescentus***

530 (A) A polarity circuit in which PodJ promotes PopZ new cell pole localization, PopZ promotes  
531 SpmX accumulation at the cell poles, and SpmX negatively regulates PodJ subcellular  
532 localization at the cell poles Expression of PodJ variants and PopZ as the sole copy in *C.*  
533 *crescentus*. The cytoplasmic domain of PodJ, containing both CC4-6 and the PSE-rich domain,  
534 supports bipolar localization of PopZ and new cell pole localization of PopZ. In contrast,  
535 expression of PodJ $\Delta$ CC4-6 results in predivisional cells that fails to accumulate PopZ at the new  
536 cell pole. Removal of the domain that is required for SpmX to disperse PodJ from the cell poles,  
537 PodJ $\Delta$ PSE, results in PodJ accumulation at both cell poles in *C. crescentus*. These results  
538 indicate that the regulatory protein-protein interaction between PodJ, PopZ and SpmX are  
539 required for robust cell polarity of *C. crescentus* predivisional cells. (B) SpmX functions as a  
540 local negative regulator of PodJ accumulation at the old cell pole. (C) The establishment of the  
541 compositionally distinct new and old cell poles is driven by a network of scaffolding proteins  
542 that combines positive feedback together with inhibition.

543 References

544 Aakre, C.D., and Laub, M.T. (2012). Asymmetric cell division: a persistent issue?  
545 *Developmental cell* 22, 235-236.

546

547 Anderson-Furgeson, J.C., Zupan, J.R., Grangeon, R., and Zambryski, P.C. (2016). Loss of PodJ  
548 in *Agrobacterium tumefaciens* Leads to Ectopic Polar Growth, Branching, and Reduced Cell  
549 Division. *Journal of bacteriology* 198, 1883-1891.

550



551 Ardissonne, S., Fumeaux, C., Berge, M., Beaussart, A., Theraulaz, L., Radhakrishnan, S.K.,  
552 Dufrene, Y.F., and Viollier, P.H. (2014). Cell cycle constraints on capsulation and bacteriophage  
553 susceptibility. *Elife* 3.  
554

555 Berge, M., Campagne, S., Mignolet, J., Holden, S., Theraulaz, L., Manley, S., Allain, F.H., and  
556 Viollier, P.H. (2016). Modularity and determinants of a (bi-)polarization control system from  
557 free-living and obligate intracellular bacteria. *Elife* 5.  
558

559 Bergé, M., and Viollier, P.H. (2018). End-in-Sight: Cell Polarization by the Polygamic Organizer  
560 PopZ. *Trends in Microbiology* 26, 363-375.  
561

562 Biondi, E.G., Reisinger, S.J., Skerker, J.M., Arif, M., Perchuk, B.S., Ryan, K.R., and Laub, M.T.  
563 (2006). Regulation of the bacterial cell cycle by an integrated genetic circuit. *Nature* 444, 899-  
564 904.  
565

566 Bowman, G.R., Comolli, L.R., Gaietta, G.M., Fero, M., Hong, S.H., Jones, Y., Lee, J.H.,  
567 Downing, K.H., Ellisman, M.H., McAdams, H.H., *et al.* (2010). Caulobacter PopZ forms a polar  
568 subdomain dictating sequential changes in pole composition and function. *Molecular*  
569 *Microbiology* 76, 173-189.  
570

571 Bowman, G.R., Comolli, L.R., Zhu, J., Eckart, M., Koenig, M., Downing, K.H., Moerner, W.E.,  
572 Earnest, T., and Shapiro, L. (2008). A polymeric protein anchors the chromosomal origin/ParB  
573 complex at a bacterial cell pole. *Cell* 134, 945-955.  
574

575 Chau, A.H., Walter, J.M., Gerardin, J., Tang, C., and Lim, W.A. (2012). Designing synthetic  
576 regulatory networks capable of self-organizing cell polarization. *Cell* 151, 320-332.  
577

578 Chen, J.C., Hottes, A.K., McAdams, H.H., McGrath, P.T., Viollier, P.H., and Shapiro, L. (2006).  
579 Cytokinesis signals truncation of the PodJ polarity factor by a cell cycle-regulated protease. *The*  
580 *EMBO journal* 25, 377-386.  
581

582 Chen, J.C., Viollier, P.H., and Shapiro, L. (2005). A membrane metalloprotease participates in  
583 the sequential degradation of a Caulobacter polarity determinant. *Mol Microbiol* 55, 1085-1103.  
584

585 Chen, Y.E., Tropini, C., Jonas, K., Tsokos, C.G., Huang, K.C., and Laub, M.T. (2011). Spatial  
586 gradient of protein phosphorylation underlies replicative asymmetry in a bacterium. *Proc Natl*  
587 *Acad Sci U S A* 108, 1052-1057.  
588

589 Crymes, W.B., Jr., Zhang, D., and Ely, B. (1999). Regulation of podJ expression during the  
590 Caulobacter crescentus cell cycle. *Journal of bacteriology* 181, 3967-3973.  
591

592 Curtis, P.D., and Brun, Y.V. (2010). Getting in the loop: regulation of development in  
593 Caulobacter crescentus. *Microbiol Mol Biol Rev* 74, 13-41.  
594

- 595 Curtis, P.D., Quardokus, E.M., Lawler, M.L., Guo, X., Klein, D., Chen, J.C., Arnold, R.J., and  
596 Brun, Y.V. (2012). The scaffolding and signalling functions of a localization factor impact polar  
597 development. *Mol Microbiol* 84, 712-735.  
598
- 599 Ducret, A., Quardokus, E.M., and Brun, Y.V. (2016). MicrobeJ, a tool for high throughput  
600 bacterial cell detection and quantitative analysis. *Nature microbiology* 1, 16077.  
601
- 602 Duerig, A., Abel, S., Folcher, M., Nicollier, M., Schwede, T., Amiot, N., Giese, B., and Jenal, U.  
603 (2009). Second messenger-mediated spatiotemporal control of protein degradation regulates  
604 bacterial cell cycle progression. *Genes & development* 23, 93-104.  
605
- 606 Ebersbach, G., Briegel, A., Jensen, G.J., and Jacobs-Wagner, C. (2008). A self-associating  
607 protein critical for chromosome attachment, division, and polar organization in *Caulobacter*. *Cell*  
608 134, 956-968.  
609
- 610 Ehrle, H.M., Guidry, J.T., Iacovetto, R., Salisbury, A.K., Sandidge, D.J., and Bowman, G.R.  
611 (2017). Polar Organizing Protein PopZ Is Required for Chromosome Segregation in  
612 *Agrobacterium tumefaciens*. *Journal of bacteriology* 199.  
613
- 614 Ely, B. (1991). Genetics of *Caulobacter crescentus*. *Methods Enzymol* 204, 372-384.  
615 Ettema, T.J., and Andersson, S.G. (2009). The alpha-proteobacteria: the Darwin finches of the  
616 bacterial world. *Biology letters* 5, 429-432.  
617
- 618 Evinger, M., and Agabian, N. (1977). Envelope-associated nucleoid from *Caulobacter crescentus*  
619 stalked and swarmer cells. *Journal of bacteriology* 132, 294-301.  
620
- 621 Grangeon, R., Zupan, J.R., Anderson-Furgeson, J., and Zambryski, P.C. (2015). PopZ identifies  
622 the new pole, and PodJ identifies the old pole during polar growth in *Agrobacterium*  
623 *tumefaciens*. *Proc Natl Acad Sci U S A* 112, 11666-11671.  
624
- 625 Hanson, J., Yang, Y., Paliwal, K., and Zhou, Y. (2017). Improving protein disorder prediction by  
626 deep bidirectional long short-term memory recurrent neural networks. *Bioinformatics (Oxford,*  
627 *England)* 33, 685-692.  
628
- 629 Hardy, G.G., Allen, R.C., Toh, E., Long, M., Brown, P.J., Cole-Tobian, J.L., and Brun, Y.V.  
630 (2010). A localized multimeric anchor attaches the *Caulobacter* holdfast to the cell pole.  
631 *Molecular microbiology* 76, 409-427.  
632
- 633 Hinz, A.J., Larson, D.E., Smith, C.S., and Brun, Y.V. (2003). The *Caulobacter crescentus* polar  
634 organelle development protein PodJ is differentially localized and is required for polar targeting  
635 of the PleC development regulator. *Mol Microbiol* 47, 929-941.  
636
- 637 Holmes, J.A., Follett, S.E., Wang, H., Meadows, C.P., Varga, K., and Bowman, G.R. (2016).  
638 *Caulobacter* PopZ forms an intrinsically disordered hub in organizing bacterial cell poles. *Proc*  
639 *Natl Acad Sci U S A* 113, 12490-12495.

- 640 Holtzendorff, J., Hung, D., Brende, P., Reisenauer, A., Viollier, P.H., McAdams, H.H., and  
641 Shapiro, L. (2004). Oscillating global regulators control the genetic circuit driving a bacterial cell  
642 cycle. *Science (New York, NY)* *304*, 983-987.  
643
- 644 Howell, M., Aliashkevich, A., Salisbury, A.K., Cava, F., Bowman, G.R., and Brown, P.J.B.  
645 (2017). Absence of the Polar Organizing Protein PopZ Results in Reduced and Asymmetric Cell  
646 Division in *Agrobacterium tumefaciens*. *Journal of bacteriology* *199*.  
647
- 648 Huang, K.C., and Ramamurthi, K.S. (2010). Macromolecules that prefer their membranes curvy.  
649 *Molecular Microbiology* *76*, 822-832.  
650
- 651 Huitema, E., Pritchard, S., Matteson, D., Radhakrishnan, S.K., and Viollier, P.H. (2006).  
652 Bacterial birth scar proteins mark future flagellum assembly site. *Cell* *124*, 1025-1037.  
653
- 654 Kozlowski, L.P., and Bujnicki, J.M. (2012). MetaDisorder: a meta-server for the prediction of  
655 intrinsic disorder in proteins. *BMC bioinformatics* *13*, 111.  
656
- 657 Laloux, G., and Jacobs-Wagner, C. (2013). Spatiotemporal control of PopZ localization through  
658 cell cycle-coupled multimerization. *The Journal of cell biology* *201*, 827-841.  
659
- 660 Lam, H., Schofield, W.B., and Jacobs-Wagner, C. (2006). A landmark protein essential for  
661 establishing and perpetuating the polarity of a bacterial cell. *Cell* *124*, 1011-1023.  
662
- 663 Lasker, K., Mann, T.H., and Shapiro, L. (2016). An intracellular compass spatially coordinates  
664 cell cycle modules in *Caulobacter crescentus*. *Current opinion in microbiology* *33*, 131-139.  
665
- 666 Laub, M.T., Chen, S.L., Shapiro, L., and McAdams, H.H. (2002). Genes directly controlled by  
667 CtrA, a master regulator of the *Caulobacter* cell cycle. *Proceedings of the National Academy of*  
668 *Sciences of the United States of America* *99*, 4632-4637.  
669
- 670 Lawaree, E., Gillet, S., Louis, G., Tilquin, F., Le Blastier, S., Cambier, P., and Matroule, J.Y.  
671 (2016). *Caulobacter crescentus* intrinsic dimorphism provides a prompt bimodal response to  
672 copper stress. *Nature microbiology* *1*, 16098.  
673
- 674 Lawler, M.L., Larson, D.E., Hinz, A.J., Klein, D., and Brun, Y.V. (2006). Dissection of  
675 functional domains of the polar localization factor PodJ in *Caulobacter crescentus*. *Mol*  
676 *Microbiol* *59*, 301-316.  
677
- 678 Li, F., He, X., Ye, D., Lin, Y., Yu, H., Yao, C., Huang, L., Zhang, J., Wang, F., and Xu, S.  
679 (2015). NADP(+)-IDH Mutations Promote Hypersuccinylation that Impairs Mitochondria  
680 Respiration and Induces Apoptosis Resistance. *Molecular Cell* *60*, 661.  
681
- 682 Lindner, A.B., Madden, R., Demarez, A., Stewart, E.J., and Taddei, F. (2008). Asymmetric  
683 segregation of protein aggregates is associated with cellular aging and rejuvenation. *Proc Natl*  
684 *Acad Sci U S A* *105*, 3076-3081.  
685

- 686 Mann, T.H., and Shapiro, L. (2018). Integration of cell cycle signals by multi-PAS domain  
687 kinases. *Proc Natl Acad Sci U S A* *115*, E7166-e7173.  
688
- 689 Matroule, J.Y., Lam, H., Burnette, D.T., and Jacobs-Wagner, C. (2004). Cytokinesis monitoring  
690 during development; rapid pole-to-pole shuttling of a signaling protein by localized kinase and  
691 phosphatase in *Caulobacter*. *Cell* *118*, 579-590.  
692
- 693 McAdams, H.H., and Shapiro, L. (2009). System-level design of bacterial cell cycle control.  
694 *FEBS letters* *583*, 3984-3991.  
695
- 696 Mera, P.E., Kalogeraki, V.S., and Shapiro, L. (2014). Replication initiator DnaA binds at the  
697 *Caulobacter* centromere and enables chromosome segregation. *Proceedings of the National*  
698 *Academy of Sciences of the United States of America* *111*, 16100-16105.  
699
- 700 Ozaki, S., Schalch-Moser, A., Zumthor, L., Manfredi, P., Ebbensgaard, A., Schirmer, T., and  
701 Jenal, U. (2014). Activation and polar sequestration of PopA, a c-di-GMP effector protein  
702 involved in *Caulobacter crescentus* cell cycle control. *Molecular microbiology* *94*, 580-594.  
703
- 704 Park, K.T., Dajkovic, A., Wissel, M., Du, S., and Lutkenhaus, J. (2018). MinC and FtsZ mutant  
705 analysis provides insight into MinC/MinD-mediated Z ring disassembly. *The Journal of*  
706 *biological chemistry* *293*, 5834-5846.  
707
- 708 Perez, A.M., Mann, T.H., Lasker, K., Ahrens, D.G., Eckart, M.R., and Shapiro, L. (2017). A  
709 Localized Complex of Two Protein Oligomers Controls the Orientation of Cell Polarity. *mBio* *8*.  
710 Preibisch, S., Saalfeld, S., and Tomancak, P. (2009). Globally optimal stitching of tiled 3D  
711 microscopic image acquisitions. *Bioinformatics (Oxford, England)* *25*, 1463-1465.  
712
- 713 Ptacin, J.L., Gahlmann, A., Bowman, G.R., Perez, A.M., von Diezmann, A.R., Eckart, M.R.,  
714 Moerner, W.E., and Shapiro, L. (2014). Bacterial scaffold directs pole-specific centromere  
715 segregation. *Proc Natl Acad Sci U S A* *111*, E2046-2055.  
716
- 717 Radhakrishnan, S.K., Thanbichler, M., and Viollier, P.H. (2008). The dynamic interplay between  
718 a cell fate determinant and a lysozyme homolog drives the asymmetric division cycle of  
719 *Caulobacter crescentus*. *Genes & development* *22*, 212-225.  
720
- 721 Schindelin, J., Arganda-Carreras, I., Frise, E., Kaynig, V., Longair, M., Pietzsch, T., Preibisch,  
722 S., Rueden, C., Saalfeld, S., Schmid, B., *et al.* (2012). Fiji: an open-source platform for  
723 biological-image analysis. *Nature methods* *9*, 676-682.  
724
- 725 Schrader, J.M., Li, G.-W., Childers, W.S., Perez, A.M., Weissman, J.S., Shapiro, L., and  
726 McAdams, H.H. (2016). Dynamic translation regulation in *Caulobacter* cell cycle control.  
727 *Proceedings of the National Academy of Sciences* *113*, E6859-E6867.  
728
- 729 Shapiro, L., Agabian-Keshishian, N., and Bendis, I. (1971). Bacterial differentiation. *Science*  
730 (New York, NY) *173*, 884-892.

- 731 Shen, X., Collier, J., Dill, D., Shapiro, L., Horowitz, M., and McAdams, H.H. (2008).  
732 Architecture and inherent robustness of a bacterial cell-cycle control system. *Proc Natl Acad Sci*  
733 *U S A 105*, 11340-11345.
- 734  
735 Thanbichler, M., and Shapiro, L. (2006). MipZ, a spatial regulator coordinating chromosome  
736 segregation with cell division in *Caulobacter*. *Cell 126*, 147-162.
- 737  
738 Tsokos, C.G., and Laub, M.T. (2012). Polarity and cell fate asymmetry in *Caulobacter*  
739 *crescentus*. *Current opinion in microbiology 15*, 744-750.
- 740  
741 Tsokos, C.G., Perchuk, B.S., and Laub, M.T. (2011). A Dynamic Complex of Signaling Proteins  
742 Uses Polar Localization to Regulate Cell-Fate Asymmetry in *Caulobacter crescentus*.  
743 *Developmental Cell 20*, 329-341.
- 744  
745 Van der Henst, C., de Barsy, M., Zorreguieta, A., Letesson, J.J., and De Bolle, X. (2013). The  
746 *Brucella* pathogens are polarized bacteria. *Microbes and infection 15*, 998-1004.
- 747  
748 Viollier, P.H., Sternheim, N., and Shapiro, L. (2002). Identification of a localization factor for  
749 the polar positioning of bacterial structural and regulatory proteins. *Proc Natl Acad Sci U S A*  
750 *99*, 13831-13836.
- 751  
752 Walsh, I., Martin, A.J., Di Domenico, T., Vullo, A., Pollastri, G., and Tosatto, S.C. (2011).  
753 CSpritz: accurate prediction of protein disorder segments with annotation for homology,  
754 secondary structure and linear motifs. *Nucleic Acids Res 39*, W190-196.
- 755  
756 Yeh, Y.C., Comolli, L.R., Downing, K.H., Shapiro, L., and McAdams, H.H. (2010). The  
757 *caulobacter* Tol-Pal complex is essential for outer membrane integrity and the positioning of a  
758 polar localization factor. *Journal of bacteriology 192*, 4847-4858.
- 759

760 **Acknowledgements.** We thank Jared Schrader for providing critical reviews of the manuscript.  
761 We also thank Lucy Shapiro for providing critical *C. crescentus* strains that supported this study.

## 762 **METHODS**

### 763 **Phase Contrast, DIC, and Epifluorescence Microscopy**

764 Cells were imaged after being immobilized on a 1.5% agarose pad containing corresponding  
765 inducers when required. Phase microscopy was performed by using a Nikon Eclipse Ti-E  
766 Inverted microscope equipped with an Andor Ixon Ultra DU897 EMCCD camera and a Nikon  
767 CFI Plan-Apochromat 100X/1.45 Oil objective. DIC microscopy was performed using the same

768 microscope and camera but with a Nikon CFI Plan-Apochromat 100X/1.45 Oil DIC objective  
769 with a Nikon DIC polarizer and slider in place. Excitation source was a Lumencor SpectraX light  
770 engine. Chroma filter cube CFP/YFP/MCHRY MTD TI was used to image ECFP (465/25M),  
771 EYFP (545/30M), and mCherry (630/60M). Chroma filter was used to image EGFP and sfGFP  
772 (470/40X, 515/30M). Chromosomal DNA was visualized by using 1.5  $\mu\text{g/ml}$  DAPI. DAPI was  
773 imaged using 395/25X, 435/26M Chroma filter set. Images were collected and processed with  
774 Nikon NIS-Elements AR software.

### 775 **Time-lapse Microscopy**

776 sfGFP-PodJ, mcherry-PopZ, SpmX-mcherry, or CFP-ParB was tracked using phase and  
777 fluorescence microscopy. Images were collected every 1-3 min over the course of 1-2 cell  
778 division (~4 h). The imaging system used was Nikon Eclipse Ti-E microscope equipped with an  
779 Andor Ixon Ultra DU897 EMCCD camera and NIS-Elements software. *C. crescentus* cells with  
780 corresponding expression gene were grown to the early-log phase in M2G or PYE medium  
781 ( $\text{OD}_{600} = 0.2$ ), and then induced by xylose or vanillic acid for 2 hours prior to synchronization.  
782 Swarmer cells were isolated from the culture by centrifugation (20 mins at 11,000 rpm, 4°C)  
783 after mixture with 1 volume of Percoll (GE Healthcare). The synchronized swarmer cells were  
784 pipetted onto an agarose (2%) pad containing medium with inducers, and sealed with wax.  
785 During time lapse experiments, phase and fluorescence images were taken in 1 min intervals for  
786 sfGFP-PodJ, mcherry-PopZ, and SpmX-mcherry. Phase and fluorescence images were taken in 3  
787 min intervals for CFP-ParB.

### 788 **Purification of PodJ, PopZ, SpmX, and PleC Variants**



789 Protein expression of all PodJ variants followed the same protocol and is described in detail  
790 below for the PodJ (1-635). To purify the cytoplasmic portion of PodJ(1-635), Rosetta (DE3)  
791 containing plasmid pwz091 was grown in 6 liters LB medium (20 µg/ml chloramphenicol and  
792 100 µg/ml ampicillin) at 37°C. The culture was then induced at an OD<sub>600</sub> of 0.4–0.6 with 0.5  
793 mM IPTG overnight at 18°C. The cells were harvested, resuspended in the lysis buffer (50 mM  
794 Tris-HCl, 700 mM KCl, 20 mM Imidazole, 0.05% dextran sulfate, pH 8.0), in the presence of  
795 protease inhibitor cocktail tablets without EDTA (Roche).

796 The cell suspension was lysed with three passes through an EmulsiFlex-C5 cell disruptor  
797 (AVESTIN, Inc., Ottawa, Canada), and the supernatant was collected by centrifuging at 13000 g  
798 for 30 min at 4°C. In addition, the insoluble cell debris was resuspended by the recover buffer  
799 (50 mM Tris-HCl, 1000 mM KCl, 20 mM Imidazole, 0.05% dextran sulfate, pH 8.0) and its  
800 supernatant was collected as well as the previous centrifugation. The combined supernatants  
801 were loaded onto a 5 ml HisTrap™ HP column (GE Healthcare) and purified with the ÄKTA™  
802 FPLC System. After washing with 10 volumes of wash buffer (50 mM Tris-HCl, 300 mM KCl,  
803 and 25 mM imidazole, pH 8.0), protein was collected by elution from the system with elution  
804 buffer (50 mM Tris-HCl, 300 mM KCl, and 500 mM imidazole, pH 8.0), and concentrated to a 3  
805 ml volume using Amicon Centrifugal Filter Unites, resulting in > 95% purity. All PodJ variants  
806 were dialyzed with a buffer containing 50 mM Tris-HCl (pH 8.0), 300 mM KCl, and then  
807 aliquoted to small volume (100 µl) and kept frozen at -80°C till use.

808 His-SpmX (1-365) REF and His-PleC\_PASCD expression and purification followed the same  
809 protocol except using a different lysis buffer (50 mM Tris-HCl, 300 mM KCl, 20 mM Imidazole,  
810 pH 8.0) and without recover step as in PodJ purification. His-PopZ was expressed and purified  
811 the same as described (Ptacin et al., 2014).

## 812 **Size Exclusion Chromatography and Native Gel Assay**

813 A gel filtration standard (Sigma) containing thyroglobulin (bovine, 669 kDa), carbonic  
814 anhydrase (bovine, 29 kDa), blue dextran (2,000 kDa), apoferritin (horse, 443 kDa),  $\beta$ -Amylase  
815 (sweet potato, 200 kDa), alcohol dehydrogenase (yeast, 150 kDa), and albumin (bovine, 66 kDa)  
816 were used to generate a molecular weight standard plot using a Superdex 200 10/300 GL column  
817 (GE Healthcare). A 3.2 mg/ml sample of His-PodJ(1-635) was loaded onto the column and  
818 eluted after 7.9 ml, 12.8 ml, and 15.0 ml of buffer, corresponding to a molecular weight of 1,851  
819 kDa, 194 kDa, and 70.7 kDa (theoretical monomer = 73.0 kDa). One representative result of  
820 triplicates was shown.

821 His-PodJ(1-635) was also analyzed by running a native gel. Protein was separated by gel  
822 electrophoresis (8% separate gel) at 80 V for at least 4 hours at 4°C (ref), using a Native protein  
823 ladder (range from 66 to 669 kDa, Thermo Fisher).

## 824 **Fluorescence Polarization Assay**

825 To label PodJ\_PSE (471-635) and PodJ\_CC4-6 (250-430), we cloned a cysteine just after the 6X  
826 His tag of these two proteins at the N-terminal. PodJ\_PSE (Cys) and PodJ\_CC4-6 (Cys)  
827 expression and purification followed the same protocol as PodJ mentioned above. These two  
828 proteins were labeled at the cysteine using thiol-reactive BODIPY™ FL N-(2-Aminoethyl)  
829 Maleimide (Thermo Fisher). The proteins were mixed together with 10-fold excess BODIPY™  
830 FL N-(2-Aminoethyl) Maleimide and allowed to react for 2 hours at room temperature, and the  
831 unreacted dye was quenched with mercaptoethanol (5% final concentration). The labelled  
832 proteins were purified via dialysis to remove unreacted fluorescent dye (5 times, 500 ml buffer  
833 and 30 mins each).



834 Fluorescence polarization binding assays were performed by mixing 100 nM labeled proteins  
835 with 0, 0.25, 0.5, 1, 2, 4, 8, 16  $\mu$ M partner protein (PopZ, SpmX, PleC, or BSA) for 45 minutes  
836 to reach binding equilibrium at the room temperature. Fluorescent Proteins were excited at 470  
837 nm and emission polarization was measured at 530 nm in an UV-vis Evol 600  
838 spectrophotometer (Thermo). Fluorescent polarization measurements were performed in  
839 triplicates, and three independent trials were averaged with error bars representing the standard  
840 deviation.

#### 841 **Western Blot**

842 Western blot analysis was used to determine if PodJ was excreted from cells upon  
843 overexpression of SpmX and in  $\Delta popZ$  strains. Cells were grown in 30 ml PYE medium to early-  
844 log phase and induced by appropriate inducer for 3 hours at 30°C. Cells were harvested at  
845 OD600 about 0.6 (4,000 g, 10 min) and resuspended using 5 ml PYE medium, and the  
846 supernatants were also collected. Next, cells were removed from supernatants by filtration using  
847 a 0.45  $\mu$ m pore membrane (GE Healthcare). The supernatants containing excreted PodJ were  
848 then condensed into 1 ml by additional centrifugation (30,000 g, 60 min). The presence of  
849 purified PodJ foci from media supernatants were confirmed by observing PodJ foci using  
850 epifluorescence microscopy.

851 Both cells and their supernatants were lysed by heating (100°C for 30 min) with protein sample  
852 buffer. Approximately 5- $\mu$ g protein from cell samples and the same volume samples from  
853 supernatants were loaded on and separated by 12% SDS-PAGE. Proteins were transferred onto  
854 PVDF membranes (GE Healthcare) and standard western blotting procedures (Li et al., 2015)  
855 were followed. The anti-GFP antibody (Cell Signaling Technology) and anti-CtrA antibody (gift

856 from Lucy Shapiro) with 1:1000 dilution was used to determine the distribution of sfGFP-PodJ  
857 and CtrA in/out of the cell, respectively. PVDF membranes were treated with an ECL western  
858 blotting kit (ThermoFisher) and visualized using a ChemiDoc XRS+ system (Bio-Rad).

859

## 860 **Flow Cytometry**

861 Strains analyzed were grown overnight in PYE under antibiotic selection pressure at 28°C. Cells  
862 were diluted to an OD<sub>600</sub> of 0.1 in PYE/antibiotic and induced with 0.03% xylose for 4 hours, if  
863 applicable. Rifampicin (20 µg/mL) was then added and cells were grown for 3 more hours to allow  
864 for complete replication of DNA. Cells were then fixed in cold, 70% ethanol overnight at 4°C for  
865 up to one week by adding 700 µL of 200 proof ethanol to 300 µL of cell culture. To stain, cells  
866 were collected by centrifugation at 6,000g for 2 minutes and resuspended in 1mL of Tris-HCl buffer  
867 (20mM Tris-HCl, pH=7.5, 150mM NaCl) containing 0.2 µg/mL RNase (RNase A, 10 mg/mL,  
868 ThermoFisher) and 1µM SYTOX Green nucleic acid stain. Cells were incubated at room  
869 temperature for 15 minutes then samples were run on a Cytoflex S (Beckman-Coulter) using 488  
870 nm laser with a FitC filter (525 nm). Cells were selected using FSC-H and SSC-H gained to 10 and  
871 20, respectively. Cells were thresholded in FitC-H at 1000. 10000 events were collected flowing at  
872 10 µL per minute with an abort rate of less than 5%. Raw data was exported to Prism and histograms  
873 were generated.

## 874 **QUANTIFICATION AND STATISTICAL ANALYSIS**

875 FIJI/ImageJ ((Schindelin et al., 2012);(Preibisch et al., 2009)) and MicrobeJ (Ducret et al., 2016)  
876 were used for image analysis. Number of replicates and number of cells analyzed per replicate are  
877 specified in corresponding legends. All experiments were replicated at least 2 times, and statistical

878 comparisons were carried out using GraphPad Prism with two-tailed Student's t tests. Differences  
879 were considered to be significant when  $p$  values were below 0.05. In all figures, measurements are  
880 shown as mean  $\pm$  standard deviations (s.d.).

### 881 **Kymograph Analyses**

882 Kymographs of fluorescence intensity were obtained by using the built-in kymograph function of  
883 the Microbe-Tracker in MicrobeJ(Ducret et al., 2016). The signal of background was subtracted  
884 before the kymograph analysis, and the observation of stalk at the pole of *C. crescentus* cell was  
885 defined as the old pole. The predivisional cell was selected as the start point cells in Figure 1C  
886 and Figure 4G. In Figure 1C, another round of kymograph analysis was performed after the first  
887 cell division. The new pole **b** became to be the old pole after cell division and another two new  
888 pole (**c** and **d**) were formed.

### 889 **Intrinsically Disordered Region Analysis**

890 The probability of intrinsic disorder region over the primary sequence of PodJ was predicted by  
891 three independent programs, *i.e.*, Metadisorder MD2(Kozlowski and Bujnicki, 2012) SPOT  
892 (Hanson et al., 2017), and Cspritz(Walsh et al., 2011). The average scores of these programs were  
893 plotted against the PodJ sequence. We assumed the region as an intrinsic disorder with the  
894 probability  $> 75\%$  in this study.

895

### 896 **Recruitment index measurement**

897 The recruitment index in Figure 3B is calculated using the formula below similar as previous  
898 described(Holmes et al., 2016).

899 
$$\text{Relative recruitment index (\%)} = \frac{a - b - c}{a - c}$$

900 Here,  $a$  is the sum of the fluorescent signal within all the cell meshes,  $b$  is the sum of the  
901 fluorescent signal in the middle of cells, and  $c$  is the background fluorescence.

902

### 903 **Calculation of Subcellular Co-Localization with PodJ variants**

904 To measurement of the co-localization ratio in Figure 3C, Figure 5C, Figure 6C, and Figure S3,  
905 we used strict criteria to calculate how the proteins interaction with the PodJ variants, *i.e.*, (I), the  
906 localization patterns of the interaction proteins are changed after co-expression. (II), the two  
907 proteins are 100% co-localized at the pole (binding), or drive each other apart from the pole  
908 (dispersion). Failure of either of these two criteria means the interaction of the two proteins is  
909 undetermined. About 200 cells were calculated for each interaction sets.

### 910 **Supplementary Figure Captions**

911 **Figure S1:** (A) Time-lapse imaging of sfGFP-PodJ induced by 0.003% xylose after two rounds  
912 of cell division. (B) sfGFP-PodJ accumulates at the new cell pole in stalk and predivisional cells.  
913 During the swarmer to stalked cell transition sfGFP-PodJ diminishes at the old cell pole.

914

915 **Figure S2:** Analysis of PodJ domain deletion library when expressed alone heterologously in *E.*  
916 *coli* or co-expressed with PopZ, SpmX or PleC fluorescent protein fusions. Solid circles indicate  
917 co-localization of PodJ variants together with PopZ, SpmX or PleC. Open circles indicate PodJ  
918 variants that do not co-localize with PopZ, SpmX or PleC. Question marks indicate no  
919 assignment can be made based upon the co-expression assay.

920

921 **Figure S3:** (A) Analysis table of PodJ co-expression with potential client proteins in *E. coli*.

922 (B) Co-expression of YFP-PodJ together with inclusion body protein A (IbpA-mChy) indicates

923 that PodJ does not co-localize with inclusion bodies in *E. coli*. (C) Three potential PodJ protein-  
924 protein interaction partners (TipN, FtsZ and SpmX) promoted dispersion of YFP-PodJ when co-  
925 expressed in *E. coli*. (D) Co-expression of YFP-PodJ together with new cell pole associated  
926 proteins (PleD, DivL, DivK, CckA) indicate that these proteins do not co-localize when  
927 expressed in *E. coli*.

928

929 **Figure S4:** Subcellular localization pattern of *Ppopz-mCherry-popZ* in wild-type,  $\Delta podJ$ , and  
930  $\Delta podJ xylX::sfGFP-podJ$  strains in the presence of 0.03% xylose in *C. crescentus* (A) pre-  
931 divisional cells and (B) newborn swarmer cells just after cell division. (C) Expression of  
932 mcherry-PopZ in BL21 *E. coli* indicates that PopZ accumulates randomly as a single focus at  
933 either the old or new cell poles.

934

935 **Figure S5:** Heterologous co-expression of PleC together with 3 new cell-pole associated  
936 scaffolds (PopZ, PodJ, and TipN). These assays indicate that PleC can be directly recruited to  
937 the cell pole by PodJ, while PleC is indirectly associated with the PopZ and TipN scaffold  
938 proteins.

939

940 **Figure S6:** (A) SpmX domain deletion library when expressed alone heterologously in *E. coli*,  
941 or co-expressed with PodJ fluorescent protein fusions. Dispersion of YFP-PodJ from the cell  
942 pole binding site requires the transmembrane domain of SpmX. The N-terminal fluorescent  
943 protein fusion of SpmX(1-356) disrupts its capability to accumulate as a focus suggesting that  
944 the N-terminus of SpmX may be involved in self-assembly. The SpmX-PodJ interaction requires  
945 both the lysozyme and proline-rich domains of SpmX. (B) Select PodJ domain deletion library

946 variants when expressed alone heterologously in *E. coli* or co-expressed with SpmX or  
947 SpmX $\Delta$ TM fluorescent protein fusions. These results suggest that PodJ's PSE and CC4-6  
948 domains are sites of interaction with SpmX.

949

950 **Figure S7.** The PopZ-PodJ interaction anchors PodJ in the cytoplasm and prevents PodJ cellular  
951 secretion. (A) PodJ is specifically secreted from *C. crescentus* strains that disrupt the PodJ-PopZ  
952 interaction (PodJ  $\Delta$ CC4-6), and (B) the PodJ secretion of *C. crescentus* requires the SpmX  
953 scaffolding protein. (C and D) Full-length sfGFP-PodJ is not secreted from wild-type cells, but  
954 is secreted from cells in the PopZ deletion strain ( $\Delta$ PopZ). (E) Fractionated media indicates the  
955 presence of sfGFP-PodJ foci in growth media strains that trigger PodJ cellular secretion. (F)  
956 Western blot of analysis of sfGFP-PodJ and CtrA inside (I) and outside (O) of the cell. The  
957  $\Delta$ PopZ strain exhibits the largest amount of extracellular sfGFP-PodJ, while western blot  
958 controls of CtrA indicates that global cell lysis is likely not contributing to the observed PodJ  
959 secreted foci.

960 Movie S1: Time-lapse imaging of sfGFP-PodJ in *C. crescentus* NA1000.

961 Movie S2. Time-lapse imaging of mcherry-PopZ in *C. crescentus* NA1000.

962 Movie S3: Time-lapse imaging of mcherry-PopZ in the *C. crescentus*  $\Delta$ podJ strain.

963 Movie S4: Time-lapse imaging of sfGFP-PodJ cellular secretion upon SpmX overexpression.

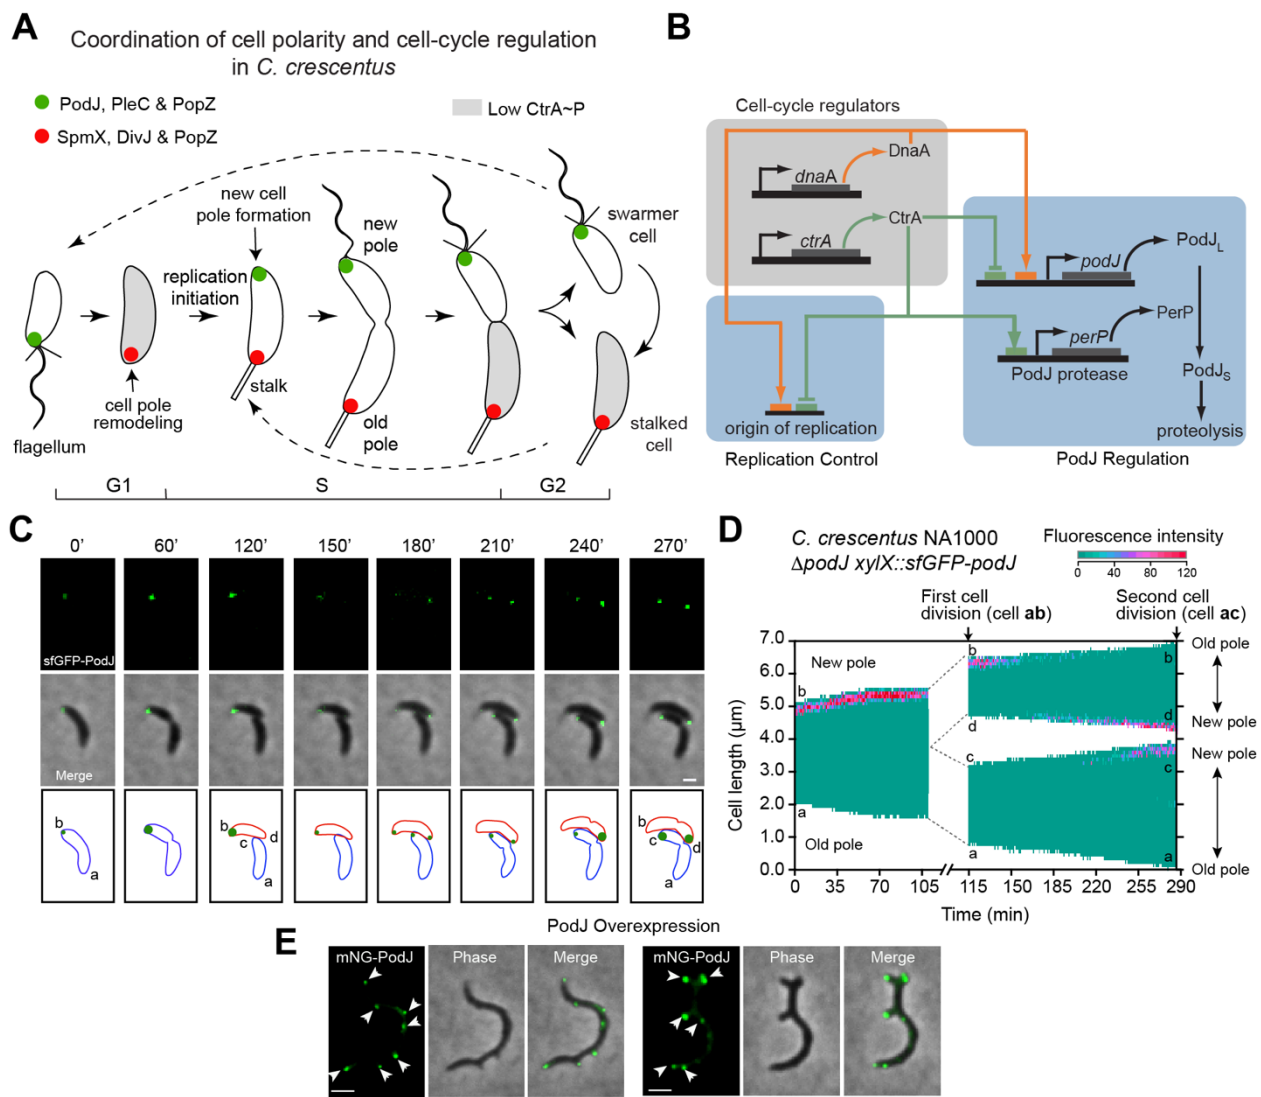

**Figure 1: The scaffolding protein PodJ recognizes the new pole and is involved in cell polarity establishment.** (A) Schematic of cell polarity establishment and cell cycle regulation in *Caulobacter crescentus*. Swarmer cells differentiate into stalked cells, which is correlated with cell pole remodeling of a PodJ-rich signaling hub (green) into a SpmX-rich signaling hub (red). In stalked cells, after initiation of replication a PodJ-rich signaling hub accumulates at the new cell pole. Cell division results in a swarmer cell that involved unequal inheritance of a PodJ-rich signaling hub in swarmer cells and a SpmX-rich signaling hub in stalked cells. (B) Two key cell-cycle regulators, CtrA and DnaA, co-regulate the initiation of replication and the transcription of PodJ and a PodJ specific protease PerP (C and D) Time-lapse microscopy analyses show PodJ accumulates at the new cell pole during the cell cycle. Kymographs of sfGFP-PodJ signal along the cell length over time after the synchronization of WSC1201 swarmer cells, images were acquired every 2 min. (E) Constitutive overnight PodJ overexpression (0.3% xylose) causes formation of ectopic cell poles that are co-localized with PodJ foci. Two representative cells are shown. All bars, 2  $\mu\text{m}$ .

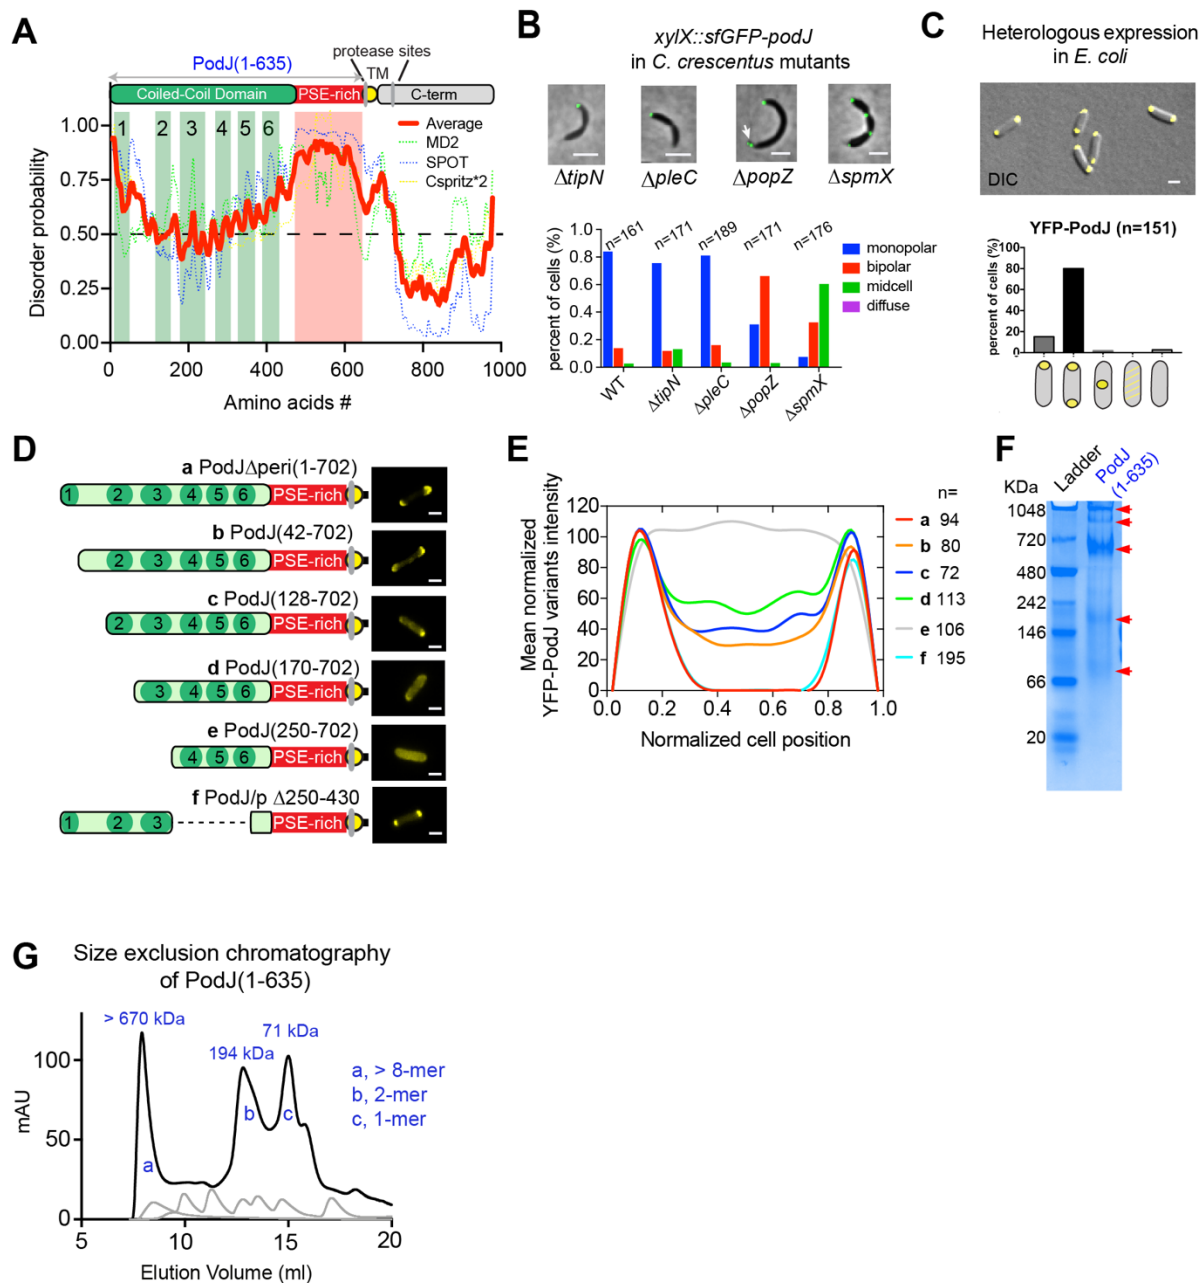

**Figure 2: PodJ is a self-assembled protein, whose monopolar accumulation is dependent upon PodJ and SpmX.** (A) PodJ domain organization predicted by HHpred and adapted from previous studies (Curtis et al., 2012; Lawler et al., 2006). The coiled-coil rich region was analyzed by PCOILS and modeled with MODELLER. The probability of intrinsic disorder over the primary sequence of PodJ (red line), represented as the average scores from four disorder prediction algorithms: Meta disorder MD2, SPOT, Cspritz\*2, and MFDp2. (B) PodJ accumulation as a concentrated focus in *C. crescentus* cells is independent of TipN, PleC, PopZ and SpmX. However, PodJ monopolar subcellular accumulation is dependent upon the PopZ and SpmX scaffolds. (C) Subcellular localization of PodJ when heterologously expressed YFP-PodJ in *E. coli*.



(D) Heterologous expression of YFP-PodJ variants in *E. coli* reveals that the N-terminal coiled-coil region 1-3 is critical for accumulation of PodJ at the cell poles. (E) The signal of YFP-PodJ along the cell length was plotted for the cells shown in Figure 2D. All of the data was normalized with the highest intensity in each strain setting as 100%. (F) Purified PodJ(1-635) was analyzed *in vitro* via native gel analysis. The protein is subjected to nondenaturing gel electrophoresis at 4°C and subsequently stained with Coomassie blue stain. Four distinct bands indicate PodJ oligomers larger 480 kDa. (G) Analytical size exclusion chromatography was used to measure the apparent molecular mass of purified PodJ(1-635) (black line), by plotting absorbance at 215 nm versus elution volume. The indicated molecular masses of each peak were determined by comparison to the elution volume of protein standards (grey lines). A representative trace is shown from three independent replicates.

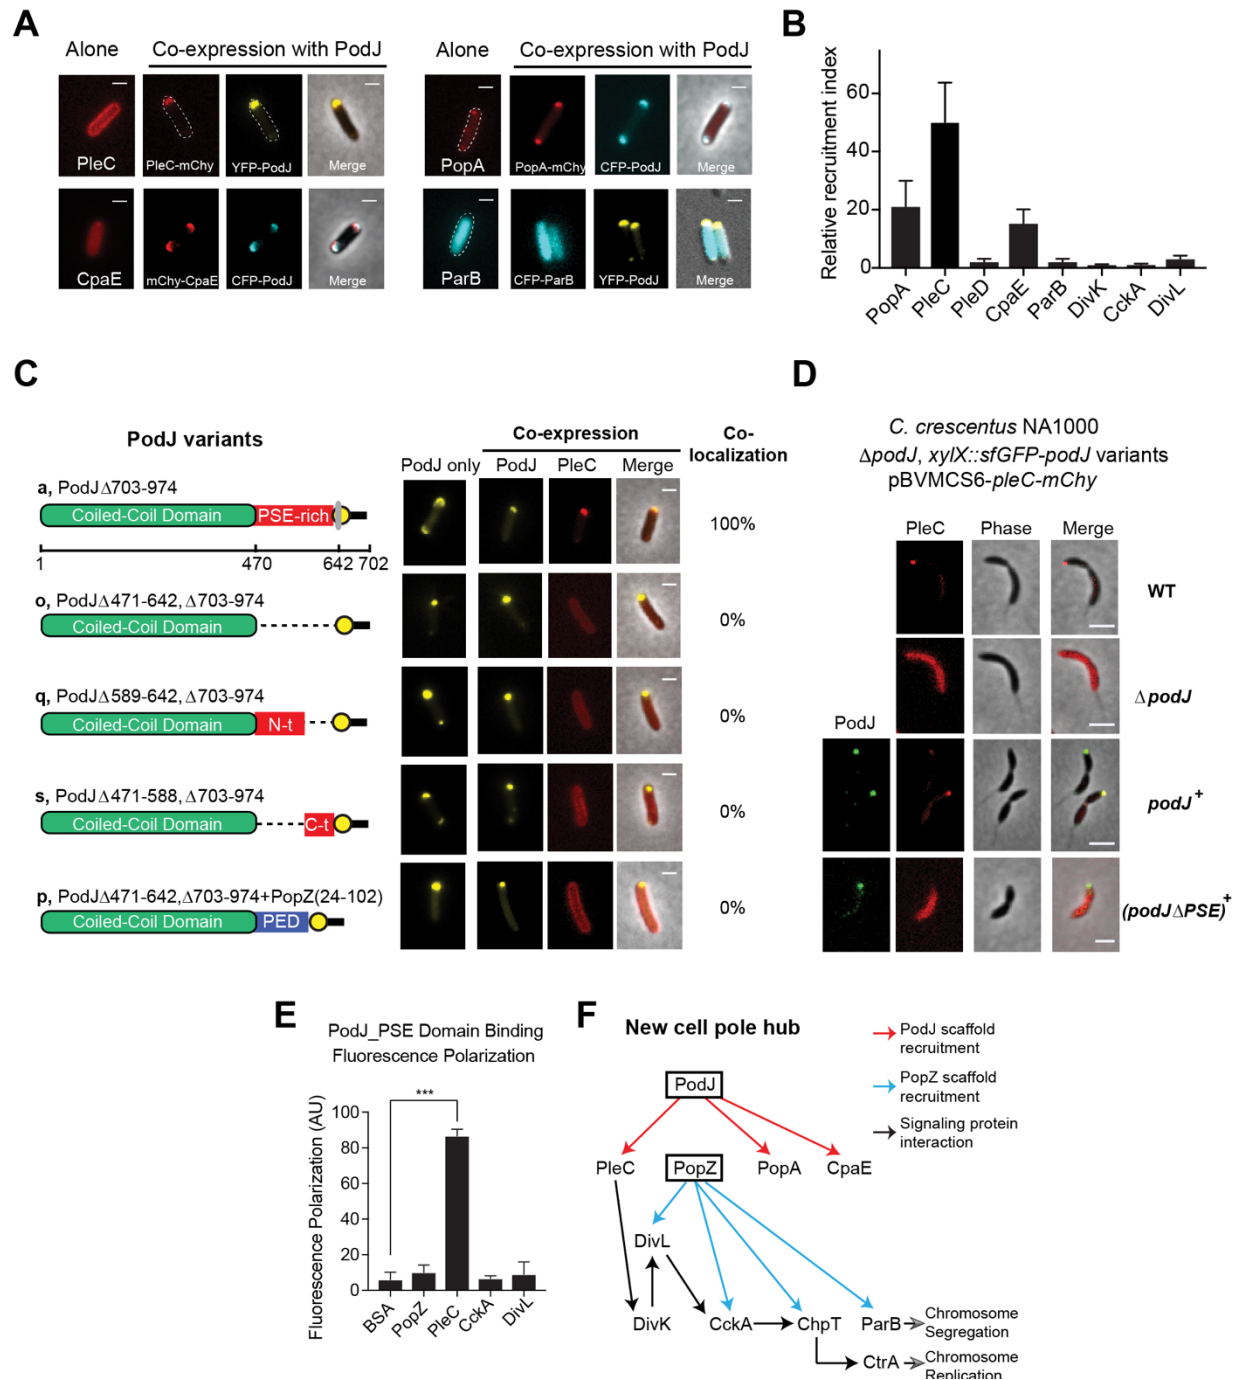

**Figure 3: PodJ is a central organizer of the new cell pole signaling hub.** The interactions between PodJ and binding partners were evaluated through heterologous co-expression in *E. coli*. (A) YFP-PodJ exhibits selective recruitment roles for the *C. crescentus* new cell pole proteins that include PleC, PopA and CpaE. (B) The polar recruitment ability by PodJ was calculated and normalized as a relative localization index. (C) Co-expression of PodJ variants together with PleC reveals that the intrinsically disordered PSE-rich domain is necessary for PleC recruitment to the cell pole in *E. coli*. (D) Expression of PodJ variants as a sole-copy in *C.*

*crenscentus* revealed that the PSE-rich domain is required for PleC accumulation at the new cell poles. (E) Fluorescence polarization binding assay confirms PodJ directly interaction with PleC. 100 nM BODIPY dye labeled PodJ\_PSE mixed with the following new cell pole proteins at 10  $\mu$ M PopZ, PleC, CckA and DivL. PodJ\_PSE specifically binds to PleC. (G) New cell pole localization hierarchy based upon these studies indicate that PodJ is a central organizer in addition to PopZ(Holmes et al., 2016) for the new cell pole signaling hub. Interactions identified in this study (red), and those discovered previously by Holmes et al. (blue)(Holmes et al., 2016).

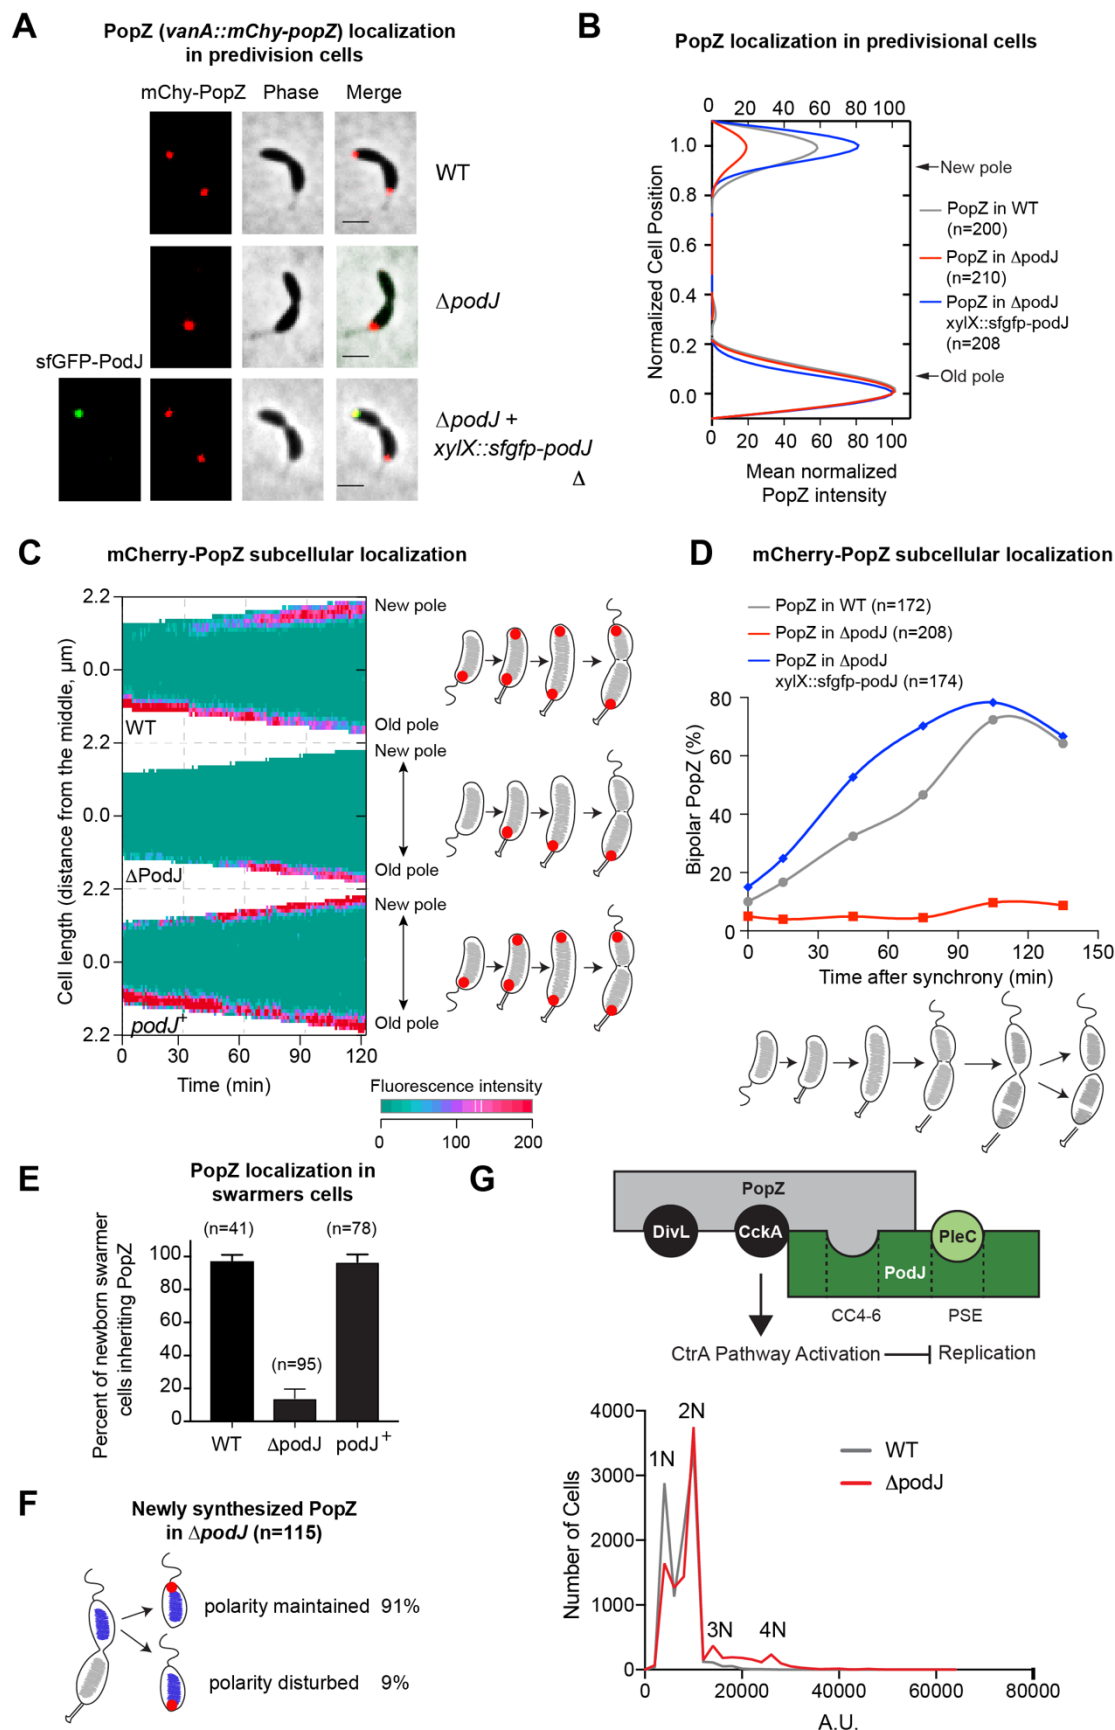

**Figure 4: PodJ nucleates PopZ assembly at the new cell pole and promotes robust inheritance of PopZ in daughter swarmer cells.** (A) mCherry-PopZ localization in predivisional cells in the wild-type (bipolar) versus the *podJ* deletion *C. crescentus* (monopolar). Bars, 2  $\mu$ m. (B) Population analysis reveals a substantial reduction of PopZ abundance at the new cell pole of  $\Delta podJ$  predivisional cells. Cell poles (new or old) were distinguished and orientated manually by observation of a stalk. The signal intensity was normalized with the highest value as 100% in each strain. (C) Kymograph analyses of mCherry-PopZ signal over the time after the synchronization of WT,  $\Delta podJ$  and *podJ* complementary cells. Vanillate (50 mM) for mChy-PopZ induction and xylose (0.03%) for sfGFP-PodJ induction were added at 1 hr prior to synchronization of the cell culture. Images were acquired every 1 min. One of three representative cells were shown for each strain. The results indicate that PopZ fails to robustly accumulate at the new cell poles prior to cell division in  $\Delta podJ$  strain. (D) Quantification of the percentage of cells that display detectable bipolar PopZ after cell synchronization. Time course analyses were performed within 135 mins in PYE medium for WT,  $\Delta podJ$  and *podJ* complementary cells (more than 130 cells were calculated for each point). Robust PopZ assembly at the new cell pole is dependent upon PodJ. (E and F) Failure to localize mcherry-PopZ to the new cell pole in  $\Delta podJ$  results in ~80% population of swarmer cells that fail to inherit PopZ. Within a subpopulation of swarmer cells (9% of cells), nascent PopZ accumulates at the incorrect cell pole switching the inherited polarity axis. A total of 40 cells were tracked by time-lapse analyses. (G) Flow cytometry analysis of wild-type versus  $\Delta podJ$  strains. When *podJ* is deleted from cells (red line), cells display a decrease in 1N and 2N cells that is accompanied with an increase in 3N and 4N cells.

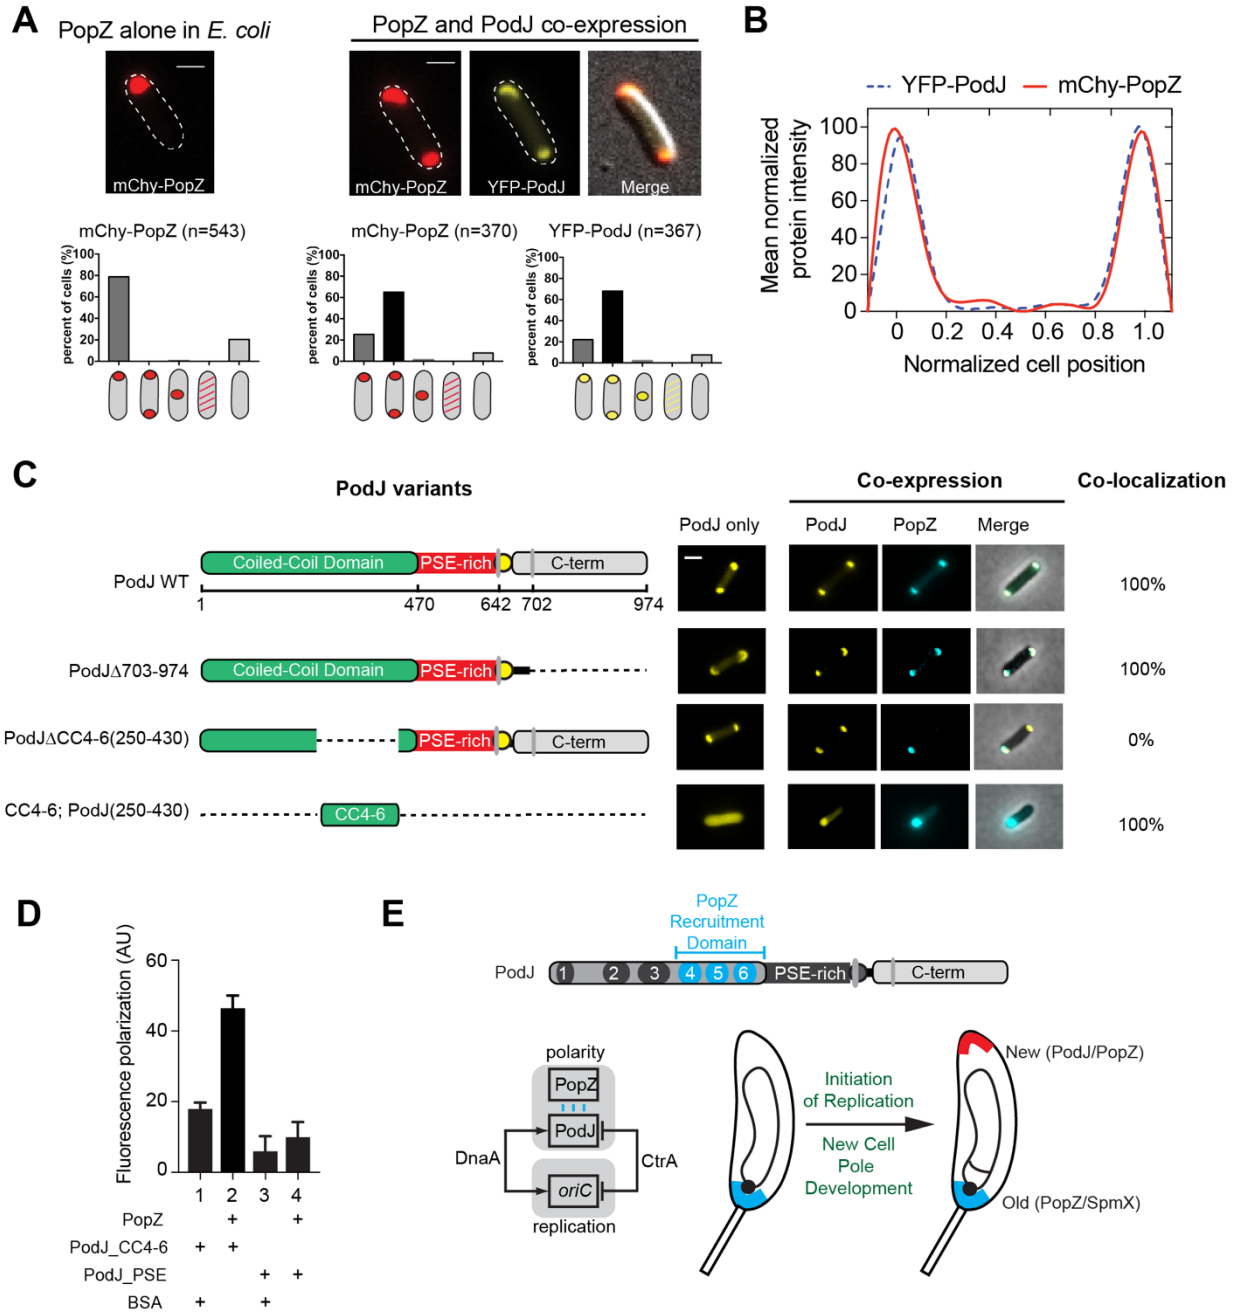

**Figure 5: PopZ binds directly to the coiled-coil 4-6 region of PodJ.** (A) Heterologous expression of YFP-PodJ and mcherry-PopZ in *E. coli*. Co-expression with PodJ causes bipolar PopZ accumulation in *E. coli*. (B) Mean protein intensity of YFP-PodJ and mcherry-PopZ versus cell length (n=370). The signal intensity was normalized with the highest value as 100% in each strain. (C) Co-expression of PodJ variants together with PopZ in *E. coli* reveals that the coiled-coil 4-6 region in PodJ is necessary for the interaction with PopZ. (D) Fluorescence polarization binding assay of the BODIPY dye labeled PodJ\_PSE or PodJ\_CC4-6 mixed with 10  $\mu$ M PopZ, using BSA as a negative control. PopZ binds specifically to the CC4-6 domain of PodJ, however does not bind to its PSE-rich domain (E) Model for PodJ serving as a new cell pole development signal

that triggers polarity establishment upon the initiation of replication, through its cell-cycle coordinated expression and specific interaction with the PopZ scaffold. All bars, 2  $\mu\text{m}$ .





**Figure 6: SpmX is a negative regulator for cell pole accumulation of PodJ.** (A) SpmX directly or indirectly regulates PodJ subcellular localization in *C. crescentus*. Overexpression of SpmX results in a reduction of cell pole localized PodJ and secretion of PodJ from cells. (B) In the absence of SpmX, PodJ accumulates at all poles in *C. crescentus*. (C) Quantitative analysis of PodJ localization in *C. crescentus* predivisional cells in wild-type,  $\Delta$ *spmX* and SpmX overexpression strains. (D) Heterologous expression of YFP-PodJ alone results in bipolar PodJ accumulation, while expression of SpmX-mcherry alone is disperse in *E. coli*. (E) Co-expression of PodJ together with SpmX causes PodJ to disperse from the cell poles in *E. coli*. All bars, 2  $\mu$ m. (F) Co-expression of PodJ variants together with a SpmX variant lacking the transmembrane domain (SpmX'). These analyses indicate that SpmX's dispersal of PodJ requires the PSE and CC4-6 domains of PodJ. (G) *In vitro* fluorescence polarization assays screening the binding interactions between SpmX and Bodipy labeled PodJ-PSE domain and PodJ-CC4-6 domains.

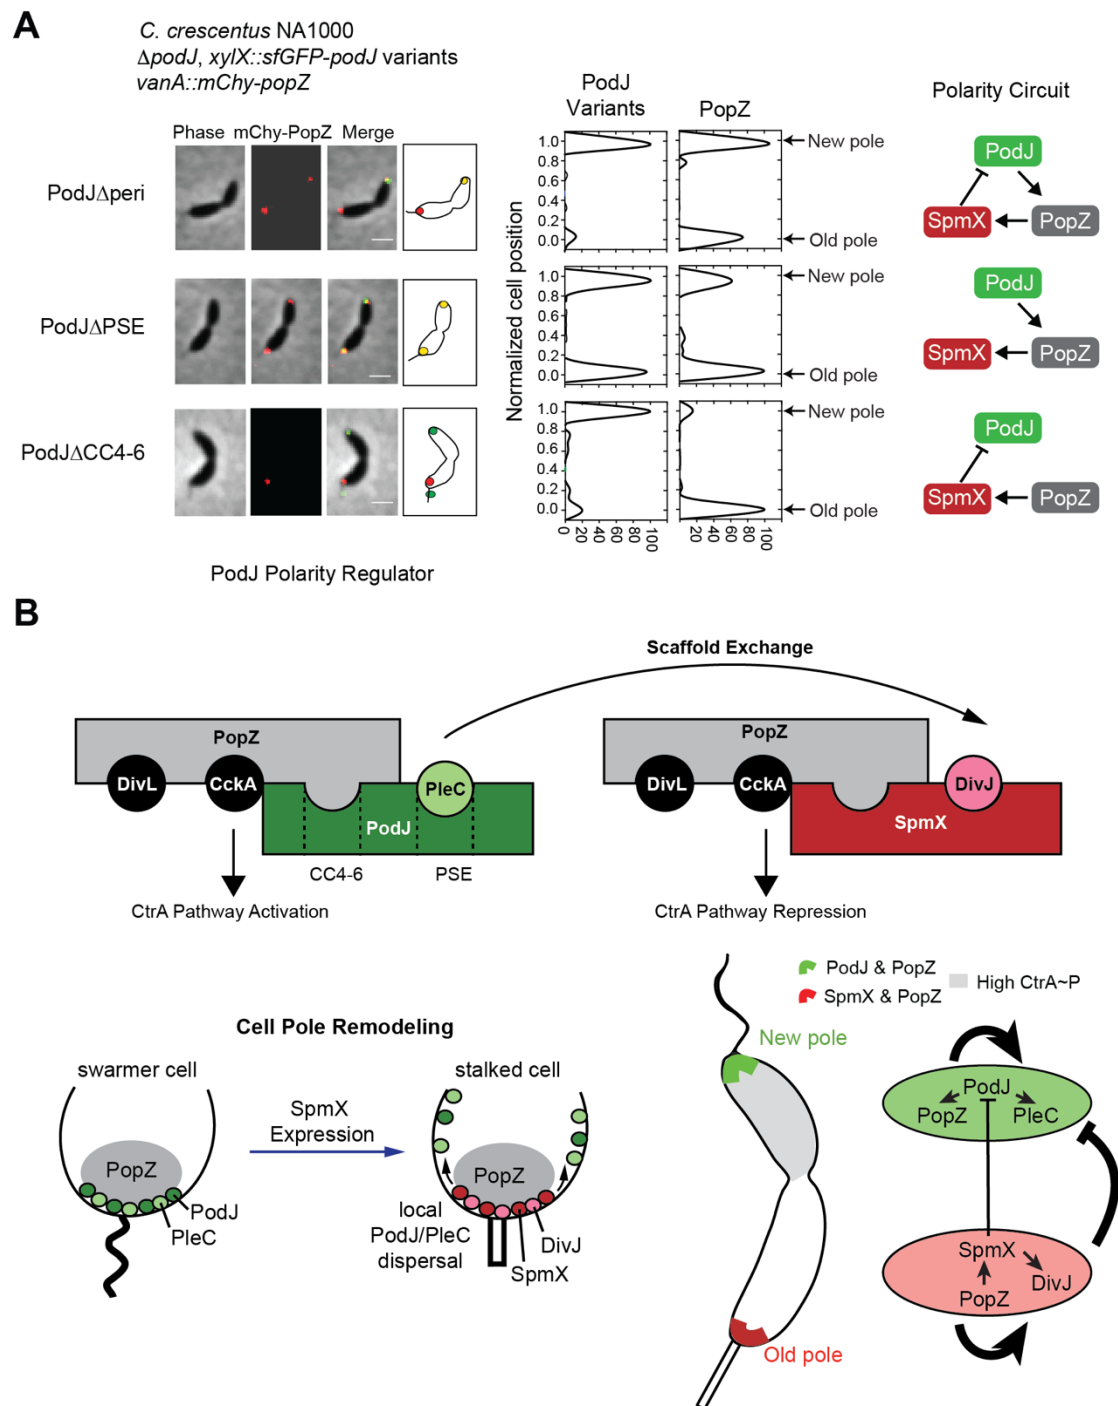

**Figure 7: A network of protein-protein regulatory interactions enable polarity establishment in *C. crescentus*** (A) A polarity circuit in which PodJ promotes PopZ new cell pole localization, PopZ promotes SpmX accumulation at the cell poles, and SpmX negatively regulates PodJ subcellular localization at the cell poles. Expression of PodJ variants and PopZ as the sole copy in *C. crescentus*. The cytoplasmic domain of PodJ, containing both CC4-6 and the PSE-rich domain, supports bipolar localization of PopZ and new cell pole localization of PopZ. In contrast,

expression of PodJ $\Delta$ CC4-6 results in predivisional cells that fails to accumulate PopZ at the new cell pole. Removal of the domain that is required for SpmX to disperse PodJ from the cell poles, PodJ $\Delta$ PSE, results in PodJ accumulation at both cell poles in *C. crescentus*. These results indicate that the regulatory protein-protein interaction between PodJ, PopZ and SpmX are required for robust cell polarity of *C. crescentus* predivisional cells. **(B)** SpmX functions as a local negative regulator of PodJ accumulation at the old cell pole. **(C)** The establishment of the compositionally distinct new and old cell poles is driven by a network of scaffolding proteins that combines positive feedback together with inhibition.
